# Supplementary material for: Database of cattle candidate genes and genetic markers for milk production and mastitis
Source: PubMed Central journal article supplement (PMC2779988; doi:10.1111/j.1365-2052.2009.01921.x), 2009-12
Supplement: age0040-0832-SD1.pdf [file age0040-0832-SD1.pdf]

**Table S1** Transgenic and knock-out murine models related to mammary gland phenotypes.

| Mouse gene    |      | Human ortholog |               | Cattle ortholog |      | Gene name               |                                                                         | Phenotype ontology terms                                                                                                                              |
|---------------|------|----------------|---------------|-----------------|------|-------------------------|-------------------------------------------------------------------------|-------------------------------------------------------------------------------------------------------------------------------------------------------|
| Gene          | Chr. | Gene           | Chr.          | Gene            | Chr. | Location (bp)           |                                                                         |                                                                                                                                                       |
| <i>Adipoq</i> | 16   | <i>ADIPOQ</i>  | 3 (q27)       | <i>APMI</i>     | 1    | 82 M                    | <i>adiponectin, C1Q and collagen domain containing</i>                  | abnormal lactation                                                                                                                                    |
| <i>Ets2</i>   | 16   | <i>ETS2</i>    | 21 (q22.2)    | <i>ETS2</i>     | 1    | 154.594.100-154.622.300 | <i>E26 avian leukemia oncogene 2, 3' domain</i>                         | mammary gland hyperplasia, mammary gland tumor                                                                                                        |
| <i>Trp63</i>  | 16   | <i>TP63</i>    | 3 (q28)       | <i>TP73L</i>    | 1    | 75 M                    | <i>transformation related protein 63</i>                                | absent mammary gland                                                                                                                                  |
| <i>Bin1</i>   | 18   | <i>BIN1</i>    | 2 (q14)       | <i>BIN1</i>     | 2    | 5.553.000-5.696.000     | <i>bridging integrator 1</i>                                            | mammary gland tumor                                                                                                                                   |
| <i>ErbB4</i>  | 1    | <i>ERBB4</i>   | 2 (q33.3-q34) | <i>ERBB4</i>    | 2    | 94 M                    | <i>v-erb-a erythroblastic leukemia viral oncogene homolog 4 (avian)</i> | abnormal mammary gland morphology, abnormal mammary gland growth during lactation, abnormal mammary gland growth during pregnancy, abnormal lactation |
| <i>Gli2</i>   | 1    | <i>GLI2</i>    | 2 (q14)       | <i>GLI2</i>     | 2    | 75.860.000-76.480.000   | <i>GLI-Kruppel family member GLI2</i>                                   | abnormal mammary gland development                                                                                                                    |
| <i>Pax3</i>   | 1    | <i>PAX3</i>    | 2 (q35)       | <i>PAX3</i>     | 2    | 114.961.000-115.156.000 | <i>paired box gene 3</i>                                                | abnormal mammary gland embryonic development                                                                                                          |
| <i>Inhbb</i>  | 1    | <i>INHBB</i>   | 2 (cent-q13)  | <i>INHBB</i>    | 2    | 75.596.700-75.603.800   | <i>inhibin beta</i>                                                     | abnormal mammary gland morphology, abnormal lactation, abnormal milk ejection                                                                         |
| <i>Creb1</i>  | 1    | <i>CREB1</i>   | 2 (q34)       | <i>CREB1</i>    | 2    | 88 M                    | <i>cAMP responsive element binding protein 1</i>                        | lactation                                                                                                                                             |
| <i>Arnt</i>   | 3    | <i>ARNT</i>    | 1 (q21)       | <i>ARNT</i>     | 3    | 21.424.000-21.513.000   | <i>aryl hydrocarbon receptor nuclear translocator</i>                   | abnormal mammary gland growth during pregnancy, abnormal lactation                                                                                    |
| <i>Cdkn2c</i> | 4    | <i>CDKN2C</i>  | 1 (p32)       | <i>CDKN2C</i>   | 3    | 102.127.000-102.138.100 | <i>cyclin-dependent kinase inhibitor 2C (p18, inhibits CDK4)</i>        | mammary gland hyperplasia                                                                                                                             |
| <i>Csf1</i>   | 3    | <i>CSF1</i>    | 1 (p21-p13)   | <i>CSF1</i>     | 3    | 36.161.600-36.196.300   | <i>colony stimulating factor 1 (macrophage)</i>                         | abnormal branching of the mammary ductal tree, abnormal mammary gland growth during pregnancy, abnormal lactation                                     |
| <i>Lepr</i>   | 4    | <i>LEPR</i>    | 1 (p31)       | <i>LEPR</i>     | 3    | 85.560.000-85.748.000   | <i>leptin receptor</i>                                                  | abnormal lactation                                                                                                                                    |
| <i>Nit1</i>   | 1    | <i>NIT1</i>    | 1 (q21-q22)   | <i>NIT1</i>     | 3    | 9.299.900-9.307.100     | <i>nitrite 1</i>                                                        | abnormal branching of the mammary ductal tree                                                                                                         |
| <i>Rhoc</i>   | 3    | <i>RHOC</i>    | 1 (p13.1)     | <i>RHOC</i>     | 3    | 33.137.200-33.152.900   | <i>ras homolog gene family, member C</i>                                | mammary gland tumor, mammary adenocarcinoma                                                                                                           |

|               |    |               |                  |               |   |                         |                                                                          |                                                                                             |
|---------------|----|---------------|------------------|---------------|---|-------------------------|--------------------------------------------------------------------------|---------------------------------------------------------------------------------------------|
| <i>SI00a4</i> | 3  | <i>SI00A4</i> | 1 (q21)          | <i>SI00A4</i> | 3 | 18.220.700-18.226.400   | <i>SI00 calcium binding protein A4</i>                                   | mammary gland tumor, mammary adenocarcinoma                                                 |
| <i>Cav1</i>   | 6  | <i>CAVI</i>   | 7 (q31.1)        | <i>CAVI</i>   | 4 | 53.980.000-54.069.000   | <i>caveolin 1, caveolae protein</i>                                      | lactation                                                                                   |
| <i>Ghrhr</i>  | 6  | <i>GHRHR</i>  | 7 (p14)          | <i>GHRHR</i>  | 4 | 67.998.000-68.038.000   | <i>growth hormone releasing hormone receptor</i>                         | abnormal lactation                                                                          |
| <i>Gli3</i>   | 13 | <i>GLI3</i>   | 7 (p13)          | <i>GLI3</i>   | 4 | 81.580.000-82.110.000   | <i>GLI-Kruppel family member GLI3</i>                                    | abnormal mammary gland embryonic development                                                |
| <i>Hoxa9</i>  | 6  | <i>HOXA9</i>  | 7 (p15-p14)      | <i>HOXA9</i>  | 4 | 71.607.400-71.615.300   | <i>homeo box A9</i>                                                      | abnormal branching of the mammary ductal tree, abnormal lactation, mammary gland hypoplasia |
| <i>Lep</i>    | 6  | <i>LEP</i>    | 7 (q31.3)        | <i>LEP</i>    | 4 | 95.665.000-95.707.000   | <i>leptin</i>                                                            | abnormal branching of the mammary ductal tree                                               |
| <i>Meox2</i>  | 12 | <i>MEOX2</i>  | 7 (p22.1-p21.3)  | <i>MEOX2</i>  | 4 | 25.002.000-25.192.000   | <i>mesenchyme homeobox 2</i>                                             | abnormal mammary gland development, mammary gland hyperplasia, mammary gland tumor          |
| <i>Aebp</i>   | 11 | <i>AEBP</i>   | 7 (p13)          | <i>AEBP1</i>  | 4 | 79.944.600-79.959.800   | <i>AE binding protein 1</i>                                              | abnormal involution of the mammary gland                                                    |
| <i>Rint1</i>  | 5  | <i>RINT1</i>  | 7 (q22.2)        | <i>RINT1</i>  | 4 | 48.564.200-48.576.600   | <i>RAD50 interactor 1</i>                                                | mammary gland tumor, mammary adenocarcinoma                                                 |
| <i>ErbB3</i>  | 10 | <i>ERBB3</i>  | 12 (q13)         | <i>ERBB3</i>  | 5 | 61.765.000-61.817.000   | <i>v-erb-b2 erythroblastic leukemia viral oncogene homolog 3 (avian)</i> | abnormal branching of the mammary ductal tree                                               |
| <i>Pthlh</i>  | 6  | <i>PTHLH</i>  | 12 (p12.1-p11.2) | <i>PTHLH</i>  | 5 | 88.027.900-88.058.000   | <i>parathyroid hormone-like peptide</i>                                  | lactation                                                                                   |
| <i>Fkbp4</i>  | 6  | <i>FKBP4</i>  | 12 (p13.33)      | <i>FKBP4</i>  | 5 | 113.810.400-113.829.900 | <i>FK506 binding protein 4</i>                                           | abnormal mammary gland development                                                          |
| <i>Hoxc6</i>  | 15 | <i>HOXC6</i>  | 12 (q13.3)       | <i>HOXC6</i>  | 5 | 28.831.000-28.907.000   | <i>homeo box C6</i>                                                      | abnormal mammary gland physiology, abnormal lactation                                       |
| <i>Lalba</i>  | 15 | <i>LALBA</i>  | 12 (q13)         | <i>LALBA</i>  | 5 | 34.385.300-34.390.400   | <i>lactalbumin, alpha</i>                                                | abnormal mammary gland morphology, abnormal milk composition, abnormal lactation            |
| <i>Timp3</i>  | 10 | <i>TIMP3</i>  | 22 (q12.3)       | <i>TIMP3</i>  | 5 | 76.612.000-76.756.000   | <i>tissue inhibitor of metalloproteinase 3</i>                           | abnormal involution of the mammary gland, abnormal lactation                                |

|                |    |                |                 |                |   |                             |                                                                               |                                                                                                                                      |
|----------------|----|----------------|-----------------|----------------|---|-----------------------------|-------------------------------------------------------------------------------|--------------------------------------------------------------------------------------------------------------------------------------|
| <i>Mkl1</i>    | 15 | <i>MKL1</i>    | 22 (q13)        | <i>MKL1</i>    | 5 | 118.808.000-<br>119.086.000 | <i>MKL (megakaryoblastic leukemia)/myocardin-like 1</i>                       | abnormal involution of the mammary gland, abnormal mammary gland growth during lactation, abnormal lactation, abnormal milk ejection |
| <i>Areg</i>    | 5  | <i>AREG</i>    | 4 (q13-q21)     | <i>AREG</i>    | 6 | 92.446.100-<br>92.476.500   | <i>amphiregulin</i>                                                           | abnormal branching of the mammary ductal tree, abnormal mammary gland growth during pregnancy, abnormal lactation                    |
| <i>Csn2</i>    | 5  | <i>CSN2</i>    | 4 (q21.1)       | <i>CSN2</i>    | 6 | 88.322.000-<br>88.345.400   | <i>casein beta</i>                                                            | abnormal milk composition, abnormal lactation                                                                                        |
| <i>Csn3</i>    | 5  | <i>CSN3</i>    | 4 (q21.1)       | <i>CSN3</i>    | 6 | 88.511.600-<br>88.544.300   | <i>casein kappa</i>                                                           | abnormal milk composition, abnormal lactation                                                                                        |
| <i>Egf</i>     | 3  | <i>EGF</i>     | 4 (q25)         | <i>EGF</i>     | 6 | 16.740.000-<br>16.998.000   | <i>epidermal growth factor (beta urogastrone)</i>                             | abnormal branching of the mammary ductal tree, abnormal mammary gland growth during pregnancy, abnormal lactation                    |
| <i>Lef1</i>    | 3  | <i>LEF1</i>    | 4 (q23-q25)     | <i>LEF1</i>    | 6 | 18.396.000-<br>18.689.000   | <i>lymphoid enhancer binding factor 1</i>                                     | absent mammary gland                                                                                                                 |
| <i>Gnrhr</i>   | 6  | <i>GNRHR</i>   | 4 (q21.2)       | <i>GNRHR</i>   | 6 | 86.093.000-<br>86.137.000   | <i>growth hormone releasing hormone receptor</i>                              | lactation                                                                                                                            |
| <i>Msx1</i>    | 5  | <i>MSX1</i>    | 4 (p16.3-p16.1) | <i>MSX1</i>    | 6 | 108.681.500-<br>108.692.200 | <i>homeo box, msh-like 1</i>                                                  | abnormal mammary gland development                                                                                                   |
| <i>Rbpj</i>    | 5  | <i>RBPJ</i>    | 4 (p15.2)       | <i>RBPJ</i>    | 6 | 47.015.000-<br>47.292.000   | <i>recombination signal binding protein for immunoglobulin kappa J region</i> | abnormal mammary gland growth during pregnancy                                                                                       |
| <i>Csf1r</i>   | 18 | <i>CSF1R</i>   | 5 (q33-q35)     | <i>CSF1R</i>   | 7 | 60.825.000-<br>60.904.000   | <i>colony stimulating factor 1 receptor</i>                                   | abnormal mammary gland during pregnancy                                                                                              |
| <i>Kiss1r</i>  | 10 | <i>KISS1R</i>  | 19 (p13.3)      | <i>KISS1R</i>  | 7 | 46 M                        | <i>KISS1 receptor</i>                                                         | mammary gland hypoplasia                                                                                                             |
| <i>Nr3c1</i>   | 18 | <i>NR3C1</i>   | 5 (q31.3)       | <i>NR3C1</i>   | 7 | 53.876.000-<br>54.166.000   | <i>nuclear receptor subfamily 3, group C, member 1</i>                        | abnormal mammary gland morphology, abnormal mammary gland growth during pregnancy                                                    |
| <i>Pin1</i>    | 9  | <i>PIN1</i>    | 19 (p13)        | <i>PIN1</i>    | 7 | 12.875.500-<br>12.906.100   | <i>protein (peptidyl-prolyl cis/trans isomerase) NIMA-interacting 1</i>       | abnormal mammary gland growth during pregnancy                                                                                       |
| <i>Cttna1</i>  | 18 | <i>CTNNA1</i>  | 5 (q31)         | <i>CTNNA1</i>  | 7 | 49.180.000-<br>49.740.000   | <i>catenin (cadherin associated protein), alpha 1</i>                         | abnormal mammary gland morphology, abnormal lactation, abnormal milk composition                                                     |
| <i>B4galt1</i> | 4  | <i>B4GALTI</i> | 9 (p13)         | <i>B4GALTI</i> | 8 | 78.943.000-<br>79.076.000   | <i>UDP-Gal:betaGlcNAc beta 1,4-galactosyltransferase, polypeptide</i>         | abnormal lactation, abnormal milk composition                                                                                        |

|                |    |                |                  |                |    |                             |                                                              |                                                                                                                                                                                              |
|----------------|----|----------------|------------------|----------------|----|-----------------------------|--------------------------------------------------------------|----------------------------------------------------------------------------------------------------------------------------------------------------------------------------------------------|
| <i>Hr</i>      | 14 | <i>HR</i>      | 8 (p21.2)        | <i>HR</i>      | 8  | 72.484.000-<br>72.523.000   | <i>hairless</i>                                              | abnormal mammary gland morphology                                                                                                                                                            |
| <i>Jak2</i>    | 19 | <i>JAK2</i>    | 9 (p24)          | <i>JAK2</i>    | 8  | 41.497.000-<br>41.664.000   | <i>Janus kinase 2</i>                                        | abnormal mammary gland growth during lactation, abnormal mammary gland growth during pregnancy, abnormal lactation                                                                           |
| <i>Ptch1</i>   | 13 | <i>PTCH1</i>   | 9 (q22.3)        | <i>PTCH1</i>   | 8  | 86.499.000-<br>86.673.000   | <i>patched homolog 1</i>                                     | abnormal mammary gland development                                                                                                                                                           |
| <i>Rln1</i>    | 19 | <i>RLNI</i>    | 9 (p24.1)        | <i>RLNI</i>    | 8  | 35 M                        | <i>relaxin 1</i>                                             | abnormal mammary gland development,                                                                                                                                                          |
| <i>Gsn</i>     | 2  | <i>GSN</i>     | 9 (q33)          | <i>GSN</i>     | 8  | 116.083.000-<br>116.152.000 | <i>gelsolin</i>                                              | abnormal branching of the mammary ductal tree, abnormal mammary gland growth during pregnancy                                                                                                |
| <i>Gja1</i>    | 10 | <i>GJAI</i>    | 6 (q21-q23.2)    | <i>GJAI</i>    | 9  | 31.049.200-<br>31.081.700   | <i>gap junction membrane channel protein alpha 1</i>         | abnormal mammary gland morphology, abnormal mammary gland growth during pregnancy, abnormal milk ejection, abnormal lactation                                                                |
| <i>Lats1</i>   | 10 | <i>LATS1</i>   | 6 (q24-q25.1)    | <i>LATS1</i>   | 9  | 90.004.000-<br>90.102.000   | <i>large tumor suppressor</i>                                | abnormal mammary gland development                                                                                                                                                           |
| <i>Plg</i>     | 17 | <i>PLG</i>     | 6 (q26)          | <i>PLG</i>     | 9  | 100.391.000-<br>100.510.000 | <i>plasminogen</i>                                           | abnormal mammary gland morphology, abnormal involution of the mammary gland, abnormal mammary gland growth during lactation, abnormal lactation, mammary gland tumor, mammary adenocarcinoma |
| <i>Apc</i>     | 18 | <i>APC</i>     | 5 (q21-q22)      | <i>APC</i>     | 10 | 567.000-<br>807.000         | <i>adenomatosis polyposis coli</i>                           | mammary gland tumor, mammary adenocarcinoma                                                                                                                                                  |
| <i>Foxb1</i>   | 9  | <i>FOXBI</i>   | 15 (q21-q26)     | <i>FOXBI</i>   | 10 | 50.628.580-<br>50.631.250   | <i>forkhead box B1</i>                                       | abnormal milk ejection, abnormal lactation                                                                                                                                                   |
| <i>Neol</i>    | 9  | <i>NEOI</i>    | 15 (q22.3-q23)   | <i>NEOI</i>    | 10 | 20.239.000-<br>20.478.000   | <i>neogenin</i>                                              | abnormal mammary gland development                                                                                                                                                           |
| <i>Slc30a4</i> | 2  | <i>SLC30A4</i> | 15 (q11.2-q21.3) | <i>SLC30A4</i> | 10 | 66.548.000-<br>66.612.000   | <i>solute carrier family 30 (zinc transporter), member 4</i> | abnormal milk composition, abnormal lactation                                                                                                                                                |
| <i>Hoxd9</i>   | 2  | <i>HOXD9</i>   | 2 (q31.1)        | <i>HOXD9</i>   | 11 | 72 M                        | <i>homeo box D9</i>                                          | mammary gland hypoplasia                                                                                                                                                                     |
| <i>Id2</i>     | 12 | <i>ID2</i>     | 2 (p25)          | <i>ID2</i>     | 11 | 91.373.900-<br>91.379.700   | <i>inhibitor of DNA binding 2</i>                            | abnormal mammary gland growth during pregnancy                                                                                                                                               |
| <i>Ncoa1</i>   | 12 | <i>NCOAI</i>   | 2 (p23)          | <i>NCOAI</i>   | 11 | 76.470.000-                 | <i>nuclear receptor coactivator 1</i>                        | abnormal mammary gland development                                                                                                                                                           |

|               |    |               |               |               |    |                       |                                                                       |                                                                                                                                                    |
|---------------|----|---------------|---------------|---------------|----|-----------------------|-----------------------------------------------------------------------|----------------------------------------------------------------------------------------------------------------------------------------------------|
| <i>Ptgs1</i>  | 2  | <i>PTGSI</i>  | 9 (q32-q33.3) | <i>PTGSI</i>  | 11 | 96.337.000-96.402.000 | <i>prostaglandin-endoperoxide synthase 1</i>                          | abnormal lactation                                                                                                                                 |
| <i>Sdc1</i>   | 12 | <i>SDCI</i>   | 2 (p24.1)     | <i>SDCI</i>   | 11 | 80.965.000-81.025.000 | <i>syndecan 1</i>                                                     | mammary gland hyperplasia                                                                                                                          |
| <i>Tgfa</i>   | 6  | <i>TGFA</i>   | 2 (p13)       | <i>TGFA</i>   | 11 | 14.415.000-14.702.000 | <i>transforming growth factor alpha</i>                               | abnormal branching of the mammary ductal tree, abnormal mammary gland growth during pregnancy, abnormal lactation                                  |
| <i>Xdh</i>    | 17 | <i>XDH</i>    | 2 (p23.1)     | <i>XDH</i>    | 11 | 14.760.000-14.910.000 | <i>xanthine dehydrogenase</i>                                         | abnormal involution of the mammary gland, abnormal mammary gland growth during lactation, abnormal milk composition, lactation, abnormal lactation |
| <i>Atp7b</i>  | 8  | <i>ATP7B</i>  | 13 (q14.3)    | <i>ATP7B</i>  | 12 | 20.773.000-20.893.000 | <i>ATPase, Cu+++ transporting, beta polypeptide</i>                   | abnormal mammary gland physiology, lactation                                                                                                       |
| <i>BrcA2</i>  | 5  | <i>BRCA2</i>  | 13 (q12.3)    | <i>BRCA2</i>  | 12 | 28.376.000-28.506.000 | <i>breast cancer 2</i>                                                | mammary adenocarcinoma                                                                                                                             |
| <i>Rxfp2</i>  | 5  | <i>RXFP2</i>  | 13 (q13.1)    | <i>RXFP2</i>  | 12 | 28.967.000-29.117.000 | <i>relaxin/insulin-like family peptide receptor 2</i>                 | abnormal nipple morphology, abnormal lactation                                                                                                     |
| <i>Gata3</i>  | 2  | <i>GATA3</i>  | 10 (p15)      | <i>GATA3</i>  | 13 | 14.680.700-14.689.200 | <i>GATA binding protein 3</i>                                         | abnormal mammary gland morphology, abnormal nipple morphology                                                                                      |
| <i>Ncoa3</i>  | 2  | <i>NCOA3</i>  | 20 (q12)      | <i>NCOA3</i>  | 13 | 77.018.000-77.091.000 | <i>nuclear receptor coactivator 3</i>                                 | abnormal branching of the mammary ductal tree                                                                                                      |
| <i>Oxt</i>    | 2  | <i>OXT</i>    | 20 (p13)      | <i>OXT</i>    | 13 | 52.672.300-52.674.540 | <i>oxytocin</i>                                                       | abnormal mammary gland growth during lactation, abnormal milk ejection, abnormal lactation                                                         |
| <i>Pofut</i>  | 2  | <i>POFUT1</i> | 20 (q11)      | <i>POFUT1</i> | 13 | 62.525.000-62.625.000 | <i>protein O-fucosyltransferase 1</i>                                 | abnormal mammary gland growth during pregnancy                                                                                                     |
| <i>Prokr2</i> | 2  | <i>PROKR2</i> | 20 (p12.3)    | <i>PROKR2</i> | 13 | 47.730.000-47.748.300 | <i>prokineticin receptor 2</i>                                        | abnormal mammary gland morphology                                                                                                                  |
| <i>Igfb1</i>  | 8  | <i>ITGB1</i>  | 10 (p11.2)    | <i>ITGB1</i>  | 13 | 19.205.000-19.310.000 | <i>integrin beta 1</i>                                                | abnormal mammary gland morphology, abnormal mammary gland growth during lactation, resistance to mammary neoplasm                                  |
| <i>Dgat1</i>  | 15 | <i>DGATI</i>  | 8 (q24.3)     | <i>DGATI</i>  | 14 | 442.100-448.800       | <i>diacylglycerol O-acyltransferase 1</i>                             | abnormal lactation                                                                                                                                 |
| <i>Mcm4</i>   | 16 | <i>MCM4</i>   | 8 (q11.2)     | <i>MCM4</i>   | 14 | 19.201.500-19.231.400 | <i>minichromosome maintenance deficient 4 homolog (S. cerevisiae)</i> | mammary gland tumor, mammary adenocarcinoma                                                                                                        |
| <i>Mybl1</i>  | 1  | <i>MYBL1</i>  | 8 (q22)       | <i>MYBL1</i>  | 14 | 30.694.000-30.779.000 | <i>myeloblastosis oncogene-like 1</i>                                 | abnormal lactation                                                                                                                                 |

|              |    |              |                |              |    |                       |                                                           |                                                                                                                                                                                                                               |
|--------------|----|--------------|----------------|--------------|----|-----------------------|-----------------------------------------------------------|-------------------------------------------------------------------------------------------------------------------------------------------------------------------------------------------------------------------------------|
| <i>Ncoa2</i> | 1  | <i>NCOA2</i> | 8 (q13.3)      | <i>NCOA2</i> | 14 | 33,980,000-34,420,000 | <i>nuclear receptor coactivator 2</i>                     | abnormal branching of the mammary ductal tree                                                                                                                                                                                 |
| <i>Zfp62</i> | 15 | <i>ZFP62</i> | 8 (q23)        | <i>FOG-2</i> | 14 | 56,360,000-57,730,000 | <i>zinc finger protein, multitype 2</i>                   | abnormal mammary gland morphology, abnormal involution of the mammary gland                                                                                                                                                   |
| <i>Cbl</i>   | 9  | <i>CBL</i>   | 11 (q23.3)     | <i>CBL</i>   | 15 | 28,289,000-28,449,000 | <i>Casitas B-lineage lymphoma</i>                         | abnormal branching of the mammary ductal tree                                                                                                                                                                                 |
| <i>Pgr</i>   | 9  | <i>PGR</i>   | 11 (q22-q23)   | <i>PGR</i>   | 15 | 6,319,000-6,610,000   | <i>progesterone receptor</i>                              | abnormal branching of the mammary ductal tree                                                                                                                                                                                 |
| <i>Bsx</i>   | 9  | <i>BSX</i>   | 11 (q24.1)     | <i>BSX</i>   | 15 | 32,265,200-32,274,400 | <i>brain specific homeobox</i>                            | abnormal involution of the mammary gland, abnormal mammary gland growth during lactation                                                                                                                                      |
| <i>Lrp4</i>  | 2  | <i>LRP4</i>  | 11 (p11.2-p12) | <i>LRP4</i>  | 15 | 77,111,000-77,205,000 | <i>low density lipoprotein receptor-related protein 4</i> | abnormal mammary gland development, abnormal mammary gland embryonic development                                                                                                                                              |
| <i>Elf5</i>  | 2  | <i>ELF2</i>  | 11 (p13-p12)   | <i>ELF2</i>  | 17 | 19,803,000-20,051,000 | <i>E74-like factor 5</i>                                  | abnormal lactation                                                                                                                                                                                                            |
| <i>Rxfp1</i> | 3  | <i>RXFPI</i> | 4 (q32.1)      | <i>RXFPI</i> | 17 | 42,244,000-42,563,000 | <i>relaxin/insulin-like family peptide receptor 1</i>     | abnormal nipple morphology, abnormal lactation                                                                                                                                                                                |
| <i>Tbx3</i>  | 5  | <i>TBX3</i>  | 12 (q24.1)     | <i>TBX3</i>  | 17 | 63,292,300-63,314,900 | <i>T-box 3</i>                                            | abnormal mammary gland embryonic development, absent mammary gland, mammary gland hypoplasia                                                                                                                                  |
| <i>Cdh1</i>  | 8  | <i>CDH1</i>  | 16 (q22.1)     | <i>CDH1</i>  | 18 | 35,014,000-35,191,000 | <i>cadherin 1</i>                                         | abnormal mammary gland morphology, abnormal mammary gland growth during lactation, abnormal mammary gland growth during pregnancy, abnormal milk composition, abnormal lactation, mammary adenocarcinoma, mammary gland tumor |
| <i>Cdh3</i>  | 8  | <i>CDH3</i>  | 16 (q22.1)     | <i>CDH3</i>  | 18 | 34,956,000-35,070,000 | <i>cadherin 3</i>                                         | mammary alveolar hyperplasia, mammary ductal hyperplasia                                                                                                                                                                      |
| <i>Usf2</i>  | 7  | <i>USF2</i>  | 19 (q13)       | <i>USF2</i>  | 18 | 45,400,000-45,423,500 | <i>upstream transcription factor 2</i>                    | lactation                                                                                                                                                                                                                     |
| <i>Cebpb</i> | 2  | <i>CEBPB</i> | 20 (q13.1)     | <i>CEBPB</i> | 18 | 48 M                  | <i>CCAAT/enhancer binding protein (C/EBP), beta</i>       | abnormal mammary gland morphology, abnormal branching of the mammary ductal tree, abnormal mammary gland physiology, abnormal lactation                                                                                       |
| <i>Brcal</i> | 11 | <i>BRCA1</i> | 17 (q21)       | <i>BRCA1</i> | 19 | 44,428,000-           | <i>breast cancer 1</i>                                    | abnormal mammary gland morphology,                                                                                                                                                                                            |

|               |    |               |              |  |               |    |                       |            |  |  |  |  |                                                                                                                                                                                                                                                                                                                      |
|---------------|----|---------------|--------------|--|---------------|----|-----------------------|------------|--|--|--|--|----------------------------------------------------------------------------------------------------------------------------------------------------------------------------------------------------------------------------------------------------------------------------------------------------------------------|
|               |    |               |              |  |               |    |                       | 44.600.000 |  |  |  |  | abnormal involution of the mammary gland, abnormal branching of the mammary ductal tree, abnormal mammary gland growth during pregnancy, mammary ductal hyperplasia, mammary gland hyperplasia, mammary adenocarcinoma, mammary gland tumor                                                                          |
| <i>Etv4</i>   | 11 | <i>ETV4</i>   | 17 (q21)     |  | <i>ETV4</i>   | 19 | 44.849.000-44.887.000 |            |  |  |  |  | abnormal branching of the mammary ductal tree, mammary gland tumor                                                                                                                                                                                                                                                   |
| <i>Grb2</i>   | 11 | <i>GRB2</i>   | 17 (q24-q25) |  | <i>GRB2</i>   | 19 | 57.741.000-58.069.000 |            |  |  |  |  | mammary gland tumor, mammary adenocarcinoma                                                                                                                                                                                                                                                                          |
| <i>Hoxb9</i>  | 11 | <i>HOXB9</i>  | 17 (q21.3)   |  | <i>HOXB9</i>  | 19 | 39.069.900-39.079.700 |            |  |  |  |  | mammary gland hypoplasia                                                                                                                                                                                                                                                                                             |
| <i>Mnt</i>    | 11 | <i>MNT</i>    | 17 (p13.3)   |  | <i>MNT</i>    | 19 | 25 M                  |            |  |  |  |  | abnormal mammary gland morphology, abnormal involution of the mammary gland, mammary gland tumor, mammary adenocarcinoma                                                                                                                                                                                             |
| <i>Nme1</i>   | 11 | <i>NME1</i>   | 17 (q21.3)   |  | <i>NME1</i>   | 19 | 36.604.000-36.670.000 |            |  |  |  |  | abnormal branching of the mammary ductal tree, abnormal lactation, lactation                                                                                                                                                                                                                                         |
| <i>Ntn1</i>   | 11 | <i>NTN1</i>   | 17 (p13-p12) |  | <i>NTN1</i>   | 19 | 28.860.000-29.350.000 |            |  |  |  |  | abnormal mammary gland development                                                                                                                                                                                                                                                                                   |
| <i>Stat5a</i> | 11 | <i>STAT5A</i> | 17 (q11.2)   |  | <i>STAT5A</i> | 19 | 43.713.000-43.764.000 |            |  |  |  |  | abnormal mammary gland morphology, abnormal involution of the mammary gland, abnormal branching of the mammary ductal tree, abnormal mammary gland growth during lactation, abnormal mammary gland growth during pregnancy, abnormal mammary gland physiology, abnormal milk ejection, lactation, abnormal lactation |
| <i>Stat5b</i> | 11 | <i>STAT5B</i> | 17 (q11.2)   |  | <i>STAT5B</i> | 19 | 43.628.000-43.719.000 |            |  |  |  |  | abnormal mammary gland physiology, lactation, abnormal lactation                                                                                                                                                                                                                                                     |
| <i>Tbx2</i>   | 11 | <i>TBX2</i>   | 17 (q23)     |  | <i>TBX2</i>   | 19 | 10.933.700-10.957.300 |            |  |  |  |  | abnormal mammary gland development                                                                                                                                                                                                                                                                                   |
| <i>Trp53</i>  | 11 | <i>TP53</i>   | 17 (p13.1)   |  | <i>TP53</i>   | 19 | 27.870.400-27.901.300 |            |  |  |  |  | mammary gland tumor, mammary adenocarcinoma                                                                                                                                                                                                                                                                          |
| <i>Fgf10</i>  | 13 | <i>FGF10</i>  | 5 (p13-      |  | <i>FGF10</i>  | 20 | 32.330.000-           |            |  |  |  |  | abnormal branching of the mammary ductal                                                                                                                                                                                                                                                                             |

|                |    |                |              |      |                |    |  |                       |  |  |  |  |                                                                                                                                                                            |
|----------------|----|----------------|--------------|------|----------------|----|--|-----------------------|--|--|--|--|----------------------------------------------------------------------------------------------------------------------------------------------------------------------------|
|                |    |                |              | p12) |                |    |  | 32.576.000            |  |  |  |  | tree, abnormal mammary gland embryonic development                                                                                                                         |
| <i>Il6st</i>   | 13 | <i>IL6ST</i>   | 5 (q11)      |      | <i>IL6ST</i>   | 20 |  | 24.760.000-24.891.000 |  |  |  |  | abnormal involution of the mammary gland                                                                                                                                   |
| <i>Iga2</i>    | 13 | <i>ITGA2</i>   | 5 (q23-q31)  |      | <i>ITGA2</i>   | 20 |  | 27.620.000-27.892.000 |  |  |  |  | abnormal branching of the mammary ductal tree                                                                                                                              |
| <i>Msx2</i>    | 13 | <i>MSX2</i>    | 5 (q34-q35)  |      | <i>MSX2</i>    | 20 |  | 6.600.500-6.612.800   |  |  |  |  | abnormal mammary gland embryonic development                                                                                                                               |
| <i>Prlr</i>    | 15 | <i>PRLR</i>    | 5 (p14-p13)  |      | <i>PRLR</i>    | 20 |  | 41.385.000-41.541.000 |  |  |  |  | abnormal lactation, lactation                                                                                                                                              |
| <i>Slc6a3</i>  | 13 | <i>SLC6A3</i>  | 5 (p15.3)    |      | <i>SLC6A3</i>  | 20 |  | 75.011.000-75.087.000 |  |  |  |  | abnormal lactation, lactation                                                                                                                                              |
| <i>Arhgap5</i> | 12 | <i>ARHGAP5</i> | 14 (q12)     |      | <i>ARHGAP5</i> | 21 |  | 43.440.800-43.450.500 |  |  |  |  | abnormal mammary gland development                                                                                                                                         |
| <i>Blm</i>     | 7  | <i>BLM</i>     | 15 (q26.1)   |      | <i>BLM</i>     | 21 |  | 21.536.000-21.705.000 |  |  |  |  | mammary adenocarcinoma, mammary gland tumor                                                                                                                                |
| <i>Mfge8</i>   | 7  | <i>MFGE8</i>   | 15 (q25)     |      | <i>MFGE8</i>   | 21 |  | 20.226.000-20.264.000 |  |  |  |  | abnormal mammary gland morphology, abnormal involution of the mammary gland, abnormal mammary gland growth during lactation, abnormal milk composition, abnormal lactation |
| <i>Ube3a</i>   | 7  | <i>UBE3A</i>   | 15 (q11-q13) |      | <i>UBE3A</i>   | 21 |  | 229.000-388.000       |  |  |  |  | abnormal mammary gland growth during pregnancy                                                                                                                             |
| <i>Egfr</i>    | 11 | <i>EGFR</i>    | 7 (p12)      |      | <i>EGFR</i>    | 22 |  | 480.000-920.000       |  |  |  |  | abnormal mammary gland morphology, abnormal lactation                                                                                                                      |
| <i>Oxtr</i>    | 6  | <i>OXTR</i>    | 3 (p25)      |      | <i>OXTR</i>    | 22 |  | 18.278.400-18.302.600 |  |  |  |  | abnormal lactation                                                                                                                                                         |
| <i>Pparg</i>   | 6  | <i>PPARG</i>   | 3 (p25)      |      | <i>PPARG</i>   | 22 |  | 58.253.000-58.435.000 |  |  |  |  | abnormal mammary gland development, abnormal mammary gland growth during pregnancy                                                                                         |
| <i>Atp2b2</i>  | 6  | <i>ATP2B2</i>  | 3 (p25.3)    |      | <i>ATP2B2</i>  | 22 |  | 55.620.000-56.070.000 |  |  |  |  | lactation                                                                                                                                                                  |
| <i>Btn1a1</i>  | 13 | <i>BTN1A1</i>  | 6 (p22.1)    |      | <i>BTN1A1</i>  | 23 |  | 31.593.400-31.609.100 |  |  |  |  | abnormal mammary gland morphology, abnormal milk composition, abnormal lactation                                                                                           |



|               |    |               |                 |               |                 |    |                           |                                                                                                     |                                                                                                                                                                                          |
|---------------|----|---------------|-----------------|---------------|-----------------|----|---------------------------|-----------------------------------------------------------------------------------------------------|------------------------------------------------------------------------------------------------------------------------------------------------------------------------------------------|
| <i>Ddr1</i>   | 17 | <i>DDR1</i>   | 6 (p21.3)       | <i>DDR1</i>   | 6 (p21.3)       | 23 | 28.085.300-<br>28.119.800 | <i>disoidin domain receptor family, member 1</i>                                                    | abnormal mammary gland morphology, abnormal lactation                                                                                                                                    |
| <i>Prl</i>    | 13 | <i>PRL</i>    | 6 (p22.2-p21.3) | <i>PRL</i>    | 6 (p22.2-p21.3) | 23 | 35.566.300-<br>35.587.800 | <i>prolactin</i>                                                                                    | abnormal mammary gland morphology, abnormal branching of the mammary ductal tree, lactation                                                                                              |
| <i>Cdkn1a</i> | 17 | <i>CDKN1A</i> | 6 (p21.2)       | <i>CDKN1A</i> | 6 (p21.2)       | 23 | 10.900.300-<br>10.921.000 | <i>cyclin-dependent kinase inhibitor 1A (P21)</i>                                                   | abnormal mammary gland growth during lactation, mammary gland tumor, mammary adenocarcinoma                                                                                              |
| <i>Actb</i>   | 5  | <i>ACTB</i>   | 7 (p15-p12)     | <i>ACTB</i>   | 7 (p15-p12)     | 25 | 40.632.600-<br>40.641.100 | <i>actin, beta, cytoplasmic</i>                                                                     | mammary gland tumor, mammary adenocarcinoma,                                                                                                                                             |
| <i>Gusb</i>   | 5  | <i>GUSB</i>   | 7 (q21.11)      | <i>GUSB</i>   | 7 (q21.11)      | 25 | 32 M                      | <i>glucuronidase, beta</i>                                                                          | abnormal lactation                                                                                                                                                                       |
| <i>Vgf</i>    | 5  | <i>VGF</i>    | 7 (q22)         | <i>VGF</i>    | 7 (q22)         | 25 | 37.705.200-<br>37.710.900 | <i>VGF nerve growth factor inducible</i>                                                            | abnormal lactation                                                                                                                                                                       |
| <i>Chuk</i>   | 19 | <i>CHUK</i>   | 10 (q24-q25)    | <i>CHUK</i>   | 10 (q24-q25)    | 26 | 21.354.000-<br>21.460.000 | <i>conserved helix-loop-helix ubiquitous kinase</i>                                                 | abnormal lactation                                                                                                                                                                       |
| <i>Fgfr2</i>  | 7  | <i>FGFR2</i>  | 10 (q26)        | <i>FGFR2</i>  | 10 (q26)        | 26 | 41.984.000-<br>42.251.000 | <i>fibroblast growth factor receptor 2</i>                                                          | abnormal mammary gland embryonic development, absent mammary gland                                                                                                                       |
| <i>Neurl</i>  | 19 | <i>NEURL</i>  | 10 (q25.1)      | <i>NEURL</i>  | 10 (q25.1)      | 26 | 24.531.000-<br>24.712.000 | <i>neuronalized-like homolog (Drosophila)</i>                                                       | abnormal lactation, lactation                                                                                                                                                            |
| <i>Pten</i>   | 19 | <i>PTEN</i>   | 10 (q23.3)      | <i>PTEN</i>   | 10 (q23.3)      | 26 | 9.806.000-<br>10.043.000  | <i>phosphatase and tensin homolog</i>                                                               | mammary gland tumor, mammary adenocarcinoma                                                                                                                                              |
| <i>Agpat6</i> | 8  | <i>AGPAT6</i> | 8 (p11.21)      | <i>AGPAT6</i> | 8 (p11.21)      | 27 | 38.923.000-<br>38.965.000 | <i>1-acylglycerol-3-phosphate O-acyltransferase 6 (lysophosphatidic acid acyltransferase, zeta)</i> | abnormal mammary gland morphology, abnormal milk composition, lactation, abnormal lactation                                                                                              |
| <i>Nrg1</i>   | 8  | <i>NRG1</i>   | 8 (p21-p12)     | <i>NRG1</i>   | 8 (p21-p12)     | 27 | 30.350.000-<br>30.890.000 | <i>neuregulin 1</i>                                                                                 | abnormal mammary gland growth during pregnancy                                                                                                                                           |
| <i>Nrg3</i>   | 14 | <i>NRG3</i>   | 10 (q22-q23)    | <i>NRG3</i>   | 10 (q22-q23)    | 28 | 35.510.000-<br>38.650.000 | <i>neuregulin 3</i>                                                                                 | abnormal mammary gland development                                                                                                                                                       |
| <i>Ppyr1</i>  | 14 | <i>PPYR1</i>  | 10 (q11.2)      | <i>PPYR1</i>  | 10 (q11.2)      | 28 | 41.790.200-<br>41.794.500 | <i>pancreatic polypeptide receptor 1</i>                                                            | abnormal mammary gland growth during pregnancy                                                                                                                                           |
| <i>Sirt1</i>  | 10 | <i>SIRT1</i>  | 10 (q21.3)      | <i>SIRT1</i>  | 10 (q21.3)      | 28 | 23.593.000-<br>23.660.000 | <i>sirtuin 1</i>                                                                                    | abnormal mammary gland development, abnormal branching of the mammary ductal tree, abnormal mammary gland growth during pregnancy, abnormal mammary gland morphology, abnormal lactation |

|               |    |               |              |               |              |               |    |                       |                                                                                        |                                                                                                                                                                                                    |
|---------------|----|---------------|--------------|---------------|--------------|---------------|----|-----------------------|----------------------------------------------------------------------------------------|----------------------------------------------------------------------------------------------------------------------------------------------------------------------------------------------------|
| <i>Tsq101</i> | 7  | <i>TSG101</i> | 11 (p15)     | <i>TSG101</i> | 11 (p15)     | <i>TSG101</i> | 29 | 27.436.000-27.540.000 | <i>tumor susceptibility gene 101</i>                                                   | abnormal lactation                                                                                                                                                                                 |
| <i>Ccnd1</i>  | 7  | <i>CCND1</i>  | 11 (q13)     | <i>CCND1</i>  | 11 (q13)     | <i>CCND1</i>  | 29 | 48.733.800-48.757.500 | <i>cyclin D1</i>                                                                       | abnormal branching of the mammary ductal tree, abnormal mammary gland growth during lactation, abnormal mammary gland growth during pregnancy, abnormal lactation, resistance to mammary neoplasia |
| <i>Chek1</i>  | 9  | <i>CHEK1</i>  | 11 (q24-q24) | <i>CHEK1</i>  | 11 (q24-q24) | <i>CHEK1</i>  | 29 | 30.568.000-30.613.000 | <i>checkpoint kinase 1 homolog (S. pombe)</i>                                          | abnormal mammary gland growth during pregnancy, abnormal lactation, mammary adenocarcinoma                                                                                                         |
| <i>Gal</i>    | 19 | <i>GAL</i>    | 11 (q13.2)   | <i>GAL</i>    | 11 (q13.2)   | <i>GAL</i>    | 29 | 47.913.700-47.928.200 | <i>galanin</i>                                                                         | abnormal branching of the mammary ductal tree, abnormal lactation                                                                                                                                  |
| <i>Birc4</i>  | X  | <i>BIRC4</i>  | X (q25)      | <i>BIRC4</i>  | X (q25)      | <i>BIRC4</i>  | X  | 6 M                   | <i>baculoviral IAP repeat-containing 4</i>                                             | abnormal milk composition                                                                                                                                                                          |
| <i>Cited1</i> | X  | <i>CITED1</i> | X (q13.1)    | <i>CITED1</i> | X (q13.1)    | <i>CITED1</i> | X  | 74 M                  | <i>cbp/p300-interacting transactivator with Glu/Asp-rich carboxy-terminal domain 1</i> | abnormal branching of the mammary ductal tree                                                                                                                                                      |
| <i>Dkc1</i>   | X  | <i>DKC1</i>   | X (q28)      | <i>DKC1</i>   | X (q28)      | <i>DKC1</i>   | X  | 40 M                  | <i>dyskeratosis congenita 1, dyskerin homolog (human)</i>                              | mammary gland tumor, mammary adenocarcinoma                                                                                                                                                        |
| <i>Apmt1</i>  | 15 | NA            | NA           | NA            | NA           | NA            | NA | NA                    | <i>accelerator of polyoma-induced mammary tumors 1</i>                                 | mammary gland tumor                                                                                                                                                                                |
| <i>Apmt2</i>  | 9  | NA            | NA           | NA            | NA           | NA            | NA | NA                    | <i>accelerator of polyoma-induced mammary tumors 2</i>                                 | mammary gland tumor                                                                                                                                                                                |
| <i>Mtes</i>   | 19 | NA            | NA           | NA            | NA           | NA            | NA | NA                    | <i>metastasis efficiency suppressor gene 1</i>                                         | mammary gland tumor, mammary gland tumor                                                                                                                                                           |
| <i>Mtv2</i>   | 18 | NA            | NA           | NA            | NA           | NA            | NA | NA                    | <i>mammary tumor virus locus 2</i>                                                     | mammary alveolar hyperplasia, mammary gland tumor, mammary adenocarcinoma                                                                                                                          |
| <i>Wap</i>    | 11 | NA            | NA           | NA            | NA           | NA            | NA | NA                    | <i>whey acidic protein</i>                                                             | abnormal milk composition, mammary adenocarcinoma                                                                                                                                                  |
| <i>Tp</i>     | 4  | NA            | NA           | NA            | NA           | NA            | NA | NA                    | <i>taupe</i>                                                                           | abnormal nipple morphology                                                                                                                                                                         |

NA, not available; M, location in mega base-pairs identified using bovine-human synteny map.
