# Supplementary material for: Database of cattle candidate genes and genetic markers for milk production and mastitis
Source: PubMed Central journal article supplement (PMC2779988; doi:10.1111/j.1365-2052.2009.01921.x), 2009-12
Supplement: age0040-0832-SD2.pdf [file age0040-0832-SD2.pdf]

**Table S2** Genes tested for association with milk and mastitis traits.

| Mouse                   |      | Human homolog   |                  | Cattle homolog  |      | Gene name                 |                                                                                | Reference                                                                                   |
|-------------------------|------|-----------------|------------------|-----------------|------|---------------------------|--------------------------------------------------------------------------------|---------------------------------------------------------------------------------------------|
| Gene                    | Chr. | Gene            | Chr.             | Gene            | Chr. | Location (bp)             |                                                                                |                                                                                             |
| Association-milk traits |      |                 |                  |                 |      |                           |                                                                                |                                                                                             |
| <i>Pou1f1</i>           | 16   | <i>POU1F1</i>   | 3 (p11)          | <i>POU1F1</i>   | 1    | 35,749,100-35,769,000     | <i>POU class 1 homeobox 1</i>                                                  | Huang <i>et al.</i> 2008                                                                    |
| <i>Stat1</i>            | 1    | <i>STAT1</i>    | 2 (q32.2)        | <i>STAT1</i>    | 2    | 83,359,000-83,440,000     | <i>signal transducer and activator of transcription 1</i>                      | Cobanoglu <i>et al.</i> 2006                                                                |
| <i>Lep</i>              | 6    | <i>LEP</i>      | 7 (q31.3)        | <i>LEP</i>      | 4    | 95,665,000-95,707,000     | <i>leptin</i>                                                                  | Leifers <i>et al.</i> 2005<br>Banos <i>et al.</i> 2008<br>Chebel <i>et al.</i> 2008         |
| <i>Olr1</i>             | 6    | <i>OLR1</i>     | 12 (p13.2-p12.3) | <i>OLR1</i>     | 5    | 107,277,400 - 107,305,700 | <i>oxidized low density lipoprotein (lectin-like) receptor 1</i>               | Khatib <i>et al.</i> 2006                                                                   |
| <i>Pparg1a</i>          | 5    | <i>PPARGC1A</i> | 4 (p15.1)        | <i>PPARGC1A</i> | 6    | 44,652,000-44,919,000     | <i>peroxisome proliferative activated receptor, gamma, coactivator 1 alpha</i> | Weikard <i>et al.</i> 2005                                                                  |
| <i>Abcg2</i>            | 6    | <i>ABCG2</i>    | 4 (q22)          | <i>ABCG2</i>    | 6    | 37,298,000-37,475,000     | <i>ATP-binding cassette, sub-family G (WHITE), member 2</i>                    | Olsen <i>et al.</i> 2007<br>Ron <i>et al.</i> 2006<br>Cohen-Zinder <i>et al.</i> 2005       |
| <i>Spp1</i>             | 5    | <i>SPP1</i>     | 4 (q21-q25)      | <i>SPP1</i>     | 6    | 37,506,500-37,523,900     | <i>secreted phosphoprotein 1 (osteopontin)</i>                                 | Leonard <i>et al.</i> 2005                                                                  |
| <i>Csn1s1</i>           | 5    | <i>CSN1S1</i>   | 4 (q21.1)        | <i>CSN1S1</i>   | 6    | 88,511,600-88,544,300     | <i>casein alpha s1</i>                                                         | Sanders <i>et al.</i> 2006<br>Kuss <i>et al.</i> 2005<br>Prinzenberg <i>et al.</i> 2003     |
| <i>Csn3</i>             | 5    | <i>CSN3</i>     | 4 (q21.1)        | <i>CSN3</i>     | 6    | 88,278,000-88,322,000     | <i>casein kappa</i>                                                            | Kaminski <i>et al.</i> 2006<br>Robitaille <i>et al.</i> 2007<br>Kaminski <i>et al.</i> 2008 |
| NA                      | NA   | NA              | NA               | <i>LGB</i>      | 11   | 107,163,200 - 107,175,000 | <i>lactoglobulin, beta</i>                                                     | Kuss <i>et al.</i> 2003<br>Ganai <i>et al.</i> 2008                                         |

|                 |                               |                 |                     |                 |    |                           |                                                                   |                                                                                                                                                                                                             |
|-----------------|-------------------------------|-----------------|---------------------|-----------------|----|---------------------------|-------------------------------------------------------------------|-------------------------------------------------------------------------------------------------------------------------------------------------------------------------------------------------------------|
| <i>Dgat1</i>    | 15                            | <i>DGATI</i>    | 8 (q24.3)           | <i>DGATI</i>    | 14 | 442.100-<br>448.800       | <i>diacylglycerol O-acyltransferase 1</i>                         | Kaminski <i>et al.</i> 2006<br>Grisart <i>et al.</i> 2002<br>Kaupé <i>et al.</i> 2007<br>Banos <i>et al.</i> 2008<br>Kaminski <i>et al.</i> 2008<br>Anton <i>et al.</i> 2008<br>Hradecka <i>et al.</i> 2008 |
| <i>Cyp11b1</i>  | <sup>15</sup><br>(44.9<br>cM) | <i>CYP11B1</i>  | <u>8 (q21)</u>      | <i>CYP11B1</i>  | 14 | 1,294,000-<br>1,303,600   | <i>cytochrome P450, subfamily XI B,<br/>polypeptide 1</i>         | Kaupé <i>et al.</i> , 2007                                                                                                                                                                                  |
| <i>Fgf2</i>     | <sup>3</sup><br>(19.3<br>cM)  | <i>FGF2</i>     | 4 (q26-<br>q27)     | <i>FGF2</i>     | 17 | 36,954,000-<br>36,961,600 | <i>fibroblast growth factor 2 (basic)</i>                         | Wang <i>et al.</i> 2008                                                                                                                                                                                     |
| <i>Nod2</i>     | <sup>8</sup><br>(C3)          | <i>NOD2</i>     | 16 (q21)            | <i>NOD2</i>     | 18 | 18,141,400-<br>18,148,000 | <i>nucleotide-binding oligomerization<br/>domain containing 2</i> | Pant <i>et al.</i> 2007                                                                                                                                                                                     |
| <i>Fasn</i>     | 11                            | <i>FASN</i>     | 17 (q25)            | <i>FASN</i>     | 19 | 49,659,250-<br>49,662,020 | <i>fatty acid synthase</i>                                        | Morris <i>et al.</i> 2007                                                                                                                                                                                   |
| <i>Stat5a</i>   | 11                            | <i>STAT5A</i>   | 17 (q11.2)          | <i>STAT5A</i>   | 19 | 43,713,000-<br>43,764,000 | <i>signal transducer and activator of<br/>transcription 5A</i>    | Brym <i>et al.</i> 2004<br>Khatib <i>et al.</i> 2008                                                                                                                                                        |
| <i>Gh</i>       | 11                            | <i>GHI</i>      | 17 (q24.2)          | <i>GHI</i>      | 19 | 52,158,000-<br>52,203,000 | <i>growth hormone</i>                                             | Zhou <i>et al.</i> 2005                                                                                                                                                                                     |
| <i>Ccl2</i>     | <sup>11</sup><br>(46.5<br>cM) | <i>CCL2</i>     | 17 (q11.2-<br>q12)  | <i>CCL2</i>     | 19 | 15,182,340-<br>15,187,010 | <i>chemokine (C-C motif) ligand 2</i>                             | Leyva-Baca <i>et al.</i> 2007                                                                                                                                                                               |
| <i>Ghr</i>      | 15                            | <i>GHR</i>      | 5 (p13-<br>p12)     | <i>GHR</i>      | 20 | 33,770,000-<br>34,200,000 | <i>growth hormone receptor</i>                                    | Blott <i>et al.</i> 2003<br>Kaminski <i>et al.</i> 2006<br>Kaminski <i>et al.</i> 2008<br>Hradecka <i>et al.</i> , 2008                                                                                     |
| <i>Serpina1</i> | 12                            | <i>SERPINA1</i> | 14 (q32.1)          | <i>SERPINA1</i> | 21 | 59,296,400-<br>59,319,900 | <i>serine protease inhibitor</i>                                  | Khatib <i>et al.</i> 2005                                                                                                                                                                                   |
| <i>Ltf</i>      | 9                             | <i>LTF</i>      | 3 (q21-<br>q23)     | <i>LTF</i>      | 22 | 54,289,000-<br>54,372,000 | <i>lactoferrin</i>                                                | Kaminski <i>et al.</i> 2006<br>Kaminski <i>et al.</i> 2008                                                                                                                                                  |
| <i>Prl</i>      | 13                            | <i>PRL</i>      | 6 (p22.2-<br>p21.3) | <i>PRL</i>      | 23 | 35,566,300-<br>35,587,800 | <i>prolactin</i>                                                  | Brym <i>et al.</i> 2005<br>He <i>et al.</i> 2006                                                                                                                                                            |

|                             |                    |                |             |                |    |                             |                                                               |                                                                                          |
|-----------------------------|--------------------|----------------|-------------|----------------|----|-----------------------------|---------------------------------------------------------------|------------------------------------------------------------------------------------------|
| NA                          | NA                 | NA             | NA          | BoLA-DRB3      | 23 | 40 M                        | major histocompatibility complex, class II, DRB3              | Sharif <i>et al.</i> 1999<br>do Nascimento <i>et al.</i> 2006<br>Rupp <i>et al.</i> 2007 |
| Scd2                        | 19<br>(43.0<br>cM) | SCD            | 10 (q24.31) | SCD            | 26 | 20M                         | stearoyl-CoA desaturase ( <i>delta</i> -9-desaturase)         | Macciotta <i>et al.</i> 2008                                                             |
| Association-mastitis traits |                    |                |             |                |    |                             |                                                               |                                                                                          |
| <i>Il8rb</i>                | 1                  | <i>IL8RB</i>   | 2 (q35)     | <i>IL8RB</i>   | 2  | 110.580.400-<br>110.599.100 | <i>interleukin 8 receptor, beta</i>                           | Youngermann <i>et al.</i> 2004                                                           |
| <i>Il8ra</i>                | 1                  | <i>IL8RA</i>   | 2 (q35)     | <i>IL8RA</i>   | 2  | 110.614.800-<br>110.619.100 | <i>interleukin 8 receptor, alpha</i>                          | Rambeaud and Pighetti 2007<br>Leyva-Bacca <i>et al.</i> 2008                             |
| <i>Tlr4</i>                 | 4                  | <i>TLR4</i>    | 9 (q32-q33) | <i>TLR4</i>    | 8  | 112.418.500-<br>112.446.100 | <i>toll-like receptor 4</i>                                   | Sharma <i>et al.</i> 2006b<br>Wang <i>et al.</i> 2007                                    |
| <i>Fezf2</i>                | 14                 | <i>FEZF2</i>   | 3 (p14.2)   | <i>FEZF2</i>   | 22 | 39.843.600-<br>39.855.300   | <i>fez family zinc finger 2</i>                               | Sugimoto <i>et al.</i> 2006                                                              |
| <i>Ltf</i>                  | 9                  | <i>LTF</i>     | 3 (q21-q23) | <i>LTF</i>     | 22 | 54.289.000-<br>54.372.000   | <i>lactoferrin</i>                                            | Wojdak-Maksimiec <i>et al.</i> 2006                                                      |
| NA                          | NA                 | NA             | NA          | BoLA-DRB3      | 23 | 26.307.000-<br>26.382.000   | major histocompatibility complex, class II, DRB3              | Sharif <i>et al.</i> 1998<br>do Nascimento <i>et al.</i> 2006<br>Rupp <i>et al.</i> 2007 |
| <i>Fgf2</i>                 | 3<br>(19.3<br>cM)  | <i>FGF2</i>    | 4 (q26-q27) | <i>FGF2</i>    | 17 | 36.954.000-<br>36.961.600   | <i>fibroblast growth factor 2 (basic)</i>                     | Wang <i>et al.</i> 2008                                                                  |
| <i>Nod2</i>                 | 8<br>(C3)          | <i>NOD2</i>    | 16 (q21)    | <i>NOD2</i>    | 18 | 18.141.400-<br>18.148.000   | <i>nucleotide-binding oligomerization domain containing 2</i> | Pant <i>et al.</i> 2007                                                                  |
| <i>Ccr2</i>                 | 9<br>(71.9<br>cM)  | <i>CCR2</i>    | 3 (p21.31)  | <i>CCR2</i>    | 22 | 54.404.230-<br>54.405.620   | <i>chemokine (C-C motif) receptor 2</i>                       | Leyva-Baca <i>et al.</i> 2007                                                            |
| <i>Cyp11b1</i>              | 15<br>(44.9<br>cM) | <i>CYP11B1</i> | 8 (q21)     | <i>CYP11B1</i> | 14 | 1.294.000-<br>1.303.600     | <i>cytochrome P450, subfamily XI B, polypeptide I</i>         | Kaube <i>et al.</i> 2007                                                                 |

NA, not available; M, location in mega base-pairs identified using bovine-human synteny map.
