# Supplementary material for: Database of cattle candidate genes and genetic markers for milk production and mastitis
Source: PubMed Central journal article supplement (PMC2779988; doi:10.1111/j.1365-2052.2009.01921.x), 2009-12
Supplement: age0040-0832-SD3.pdf [file age0040-0832-SD3.pdf]

**Table S3** Genes with expression patterns associated with mastitis.

| Mouse         |      | Human         |               | Cattle        |      | Gene name               |                                                                                           | Pathogen                         | Model org.      | Reference                               |
|---------------|------|---------------|---------------|---------------|------|-------------------------|-------------------------------------------------------------------------------------------|----------------------------------|-----------------|-----------------------------------------|
| Gene          | Chr. | Gene          | Chr.          | Gene          | Chr. | Location (bp)           |                                                                                           |                                  |                 |                                         |
| <i>Nfkbiz</i> | 16   | <i>NFKBIZ</i> | 3 (p12-q12)   | <i>NFKBIZ</i> | 1    | 47,287,100-47,314,600   | <i>nuclear factor of kappa light polypeptide gene enhancer in B-cells inhibitor, zeta</i> | <i>E. coli</i>                   | mouse           | Zheng et al. 2006                       |
| <i>Ets2</i>   | 16   | <i>ETS2</i>   | 21 (q22.2)    | <i>ETS2</i>   | 1    | 154,594,100-154,622,300 | <i>E26 avian leukemia oncogene 2, 3' domain</i>                                           | <i>E. coli</i>                   | mouse           | Zheng et al. 2006                       |
| <i>Ehhadh</i> | 16   | <i>EHHADH</i> | 3 (q26.3-q28) | <i>EHHADH</i> | 1    | 83,709,000-83,846,000   | <i>enoyl-Coenzyme A, hydratase/3-hydroxyacyl Coenzyme A dehydrogenase</i>                 | <i>E. coli</i>                   | mouse           | Zheng et al. 2006                       |
| <i>Ccl20</i>  | 1    | <i>CCL20</i>  | 2 (q33-q37)   | <i>CCL20</i>  | 2    | 120,588,800-120,596,500 | <i>chemokine (C-C motif) ligand 20</i>                                                    | <i>E. coli</i>                   | mouse           | Zheng et al. 2006                       |
| <i>Rbms1</i>  | 2    | <i>RBMS1</i>  | 2 (q24.2)     | <i>RBMS1</i>  | 2    | 36,940,000-37,480,000   | <i>RNA binding motif, single stranded interacting protein 1</i>                           | <i>E. coli</i>                   | mouse           | Zheng et al. 2006                       |
| <i>Ly75</i>   | 2    | <i>LY75</i>   | 2 (q24)       | <i>LY75</i>   | 2    | 37,390,000-38,150,000   | <i>lymphocyte antigen 75</i>                                                              | ND                               | cattle          | Schwerin et al. 2003                    |
| <i>S100a8</i> | 3    | <i>S100A8</i> | 1 (q21)       | <i>S100A8</i> | 3    | 18,480,300-18,485,100   | <i>S100 calcium binding protein A8 (calgranulin A)</i>                                    | <i>E. coli</i>                   | mouse           | Zheng et al. 2006                       |
| <i>Jun</i>    | 4    | <i>JUN</i>    | 1 (p32-p31)   | <i>JUN</i>    | 3    | 21,663,000-21,674,600   | <i>Jun oncogene</i>                                                                       | <i>E. coli</i>                   | mouse           | Zheng et al. 2006                       |
| <i>Mcl1</i>   | 3    | <i>MCL1</i>   | 1 (q21)       | <i>MCL1</i>   | 3    | 93,617,300-93,622,400   | <i>myeloid cell leukemia sequence 1</i>                                                   | <i>E. coli</i>                   | mouse           | Zheng et al. 2006                       |
| <i>Il-6</i>   | 5    | <i>IL6</i>    | 7 (p21)       | <i>IL6</i>    | 4    | 32,753,300-32,764,200   | <i>interleukin 6</i>                                                                      | <i>E. coli</i><br><i>E. coli</i> | mouse<br>cattle | Zheng et al. 2006<br>Pareek et al. 2005 |
| <i>Hgf</i>    | 5    | <i>HGF</i>    | 7 (q21.1)     | <i>HGF</i>    | 4    | 40,160,000-40,550,000   | <i>hepatocyte growth factor</i>                                                           | <i>E. coli</i>                   | mouse           | Zheng et al. 2006                       |
| <i>Btg1</i>   | 10   | <i>BTG1</i>   | 12 (q22)      | <i>BTG1</i>   | 5    | 24,782,700-24,789,500   | <i>B-cell translocation gene 1, anti-proliferative</i>                                    | <i>E. coli</i>                   | mouse           | Zheng et al. 2006                       |
| <i>Etv6</i>   | 6    | <i>ETV6</i>   | 12 (p13)      | <i>ETV6</i>   | 5    | 105,060,000-105,470,000 | <i>ets variant gene 6 (TEL oncogene)</i>                                                  | <i>E. coli</i>                   | mouse           | Zheng et al. 2006                       |
| <i>Maff</i>   | 15   | <i>MAFF</i>   | 22 (q13.1)    | <i>MAFF</i>   | 5    | 117,027,100-117,049,400 | <i>v-maf musculoaponeurotic fibrosarcoma oncogene family, protein F (avian)</i>           | <i>E. coli</i>                   | mouse           | Zheng et al. 2006                       |
| <i>Bid</i>    | 6    | <i>BID</i>    | 22 (q11.1)    | <i>BID</i>    | 5    | 49,347,600-             | <i>BH3 interacting domain death</i>                                                       | <i>E. coli</i>                   | mouse           | Zheng et al. 2006                       |



|                |    |                |                  |                |    |                         |                                                                                                                                             |                                                                                                 |                                     |                                                                                                                         |
|----------------|----|----------------|------------------|----------------|----|-------------------------|---------------------------------------------------------------------------------------------------------------------------------------------|-------------------------------------------------------------------------------------------------|-------------------------------------|-------------------------------------------------------------------------------------------------------------------------|
| <i>Map2k7</i>  | 8  | <i>MAP2K7</i>  | 19 (p13.3-p13.2) | <i>MAP2K7</i>  | 7  | 15.107.300-15.128.000   | <i>mitogen activated protein kinase kinase 7</i>                                                                                            | <i>E. coli</i>                                                                                  | mouse                               | Zheng <i>et al.</i> 2006                                                                                                |
| <i>Csf2</i>    | 11 | <i>CSF2</i>    | 5 (q31.1)        | <i>CSF2</i>    | 7  | 21.081.100-21.087.000   | <i>colony stimulating factor 2 (granulocyte-macrophage)</i>                                                                                 | <i>E. coli</i> and <i>S. aureus</i>                                                             | cattle                              | Lee <i>et al.</i> 2006                                                                                                  |
| <i>Il12b</i>   | 11 | <i>IL12B</i>   | 5 (q31.1-q33.1)  | <i>IL12B</i>   | 7  | 70.704.300-70.730.300   | <i>interleukin 12b</i>                                                                                                                      | <i>E. coli</i> and <i>S. aureus</i>                                                             | cattle                              | Lee <i>et al.</i> 2006                                                                                                  |
| <i>Tlr4</i>    | 4  | <i>TLR4</i>    | 9 (q32-q33)      | <i>TLR4</i>    | 8  | 112.418.500-112.446.100 | <i>toll-like receptor 4</i>                                                                                                                 | <i>E. coli</i> ND                                                                               | mouse<br>cattle                     | Zheng <i>et al.</i> 2006<br>Goldammer <i>et al.</i> 2004                                                                |
| <i>Ostf1</i>   | 19 | <i>OSTF1</i>   | 9q13-q21         | <i>OSTF1</i>   | 8  | 53.434.000-53.586.000   | <i>osteoclast stimulating factor 1</i>                                                                                                      | ND                                                                                              | cattle                              | Schwerin <i>et al.</i> 2003                                                                                             |
| <i>Fyn</i>     | 10 | <i>FYN</i>     | 6 (q21)          | <i>FYN</i>     | 9  | 40.320.000-40.700.000   | <i>Fyn proto-oncogene</i>                                                                                                                   | <i>E. coli</i>                                                                                  | mouse                               | Zheng <i>et al.</i> 2006                                                                                                |
| <i>Tnfaip3</i> | 10 | <i>TNFAIP3</i> | 6 (q23)          | <i>TNFAIP3</i> | 9  | 78.042.800-78.068.600   | <i>tumor necrosis factor, alpha-induced protein 3</i>                                                                                       | <i>E. coli</i>                                                                                  | mouse                               | Zheng <i>et al.</i> 2006                                                                                                |
| <i>B2m</i>     | 2  | <i>B2M</i>     | 15 (q21-q22.2)   | <i>B2M</i>     | 10 | 106.122.900-106.138.500 | <i>beta 2 microglobulin</i>                                                                                                                 | <i>E. coli</i>                                                                                  | cattle                              | Pareek <i>et al.</i> 2005                                                                                               |
| <i>Fos</i>     | 12 | <i>FOS</i>     | 14 (q24.3)       | <i>FOS</i>     | 10 | 88.957.300-88.965.900   | <i>FBJ osteosarcoma oncogene</i>                                                                                                            | <i>E. coli</i>                                                                                  | mouse                               | Zheng <i>et al.</i> 2006                                                                                                |
| <i>Acot1</i>   | 12 | <i>ACOT1</i>   | 14 (q24)         | <i>ACOT1</i>   | 10 | 87 M                    | <i>acyl-CoA thioesterase 1</i>                                                                                                              | <i>E. coli</i>                                                                                  | mouse                               | Zheng <i>et al.</i> 2006                                                                                                |
| <i>Rora</i>    | 9  | <i>RORA</i>    | 15 (q21-q22)     | <i>RORA</i>    | 10 | 48.640.000-50.690.000   | <i>RAR-related orphan receptor alpha</i>                                                                                                    | ND                                                                                              | cattle                              | Schwerin <i>et al.</i> 2003                                                                                             |
| <i>Birc2</i>   | 9  | <i>BIRC2</i>   | 11 (q22)         | <i>BIRC2</i>   | 11 | 5 M                     | <i>baculoviral IAP repeat-containing 2</i>                                                                                                  | <i>E. coli</i>                                                                                  | cattle                              | Pareek <i>et al.</i> 2005                                                                                               |
| <i>Il1b</i>    | 2  | <i>IL1B</i>    | 2 (q14)          | <i>IL1B</i>    | 11 | 48.242.900-48.263.900   | <i>interleukin 1 beta</i>                                                                                                                   | <i>E. coli</i><br><i>E. coli</i><br><i>K. pneumoniae</i><br><i>E. coli</i> and <i>S. aureus</i> | mouse<br>cattle<br>cattle<br>cattle | Zheng <i>et al.</i> 2006<br>Pareek <i>et al.</i> 2005<br>Bannerman <i>et al.</i> 2004a<br>Bannerman <i>et al.</i> 2004b |
| <i>Hadhb</i>   | 5  | <i>HADHB</i>   | 2 (p23)          | <i>HADHB</i>   | 11 | 75.298.000-75.374.000   | <i>hydroxyacyl-Coenzyme A dehydrogenase/3-ketoacyl-Coenzyme A thiolase/enoyl-Coenzyme A hydratase (trifunctional protein), beta subunit</i> | <i>E. coli</i>                                                                                  | mouse                               | Zheng <i>et al.</i> 2006                                                                                                |
| <i>Vrk2</i>    | 11 | <i>VRK2</i>    | 2 (p16-p15)      | <i>VRK2</i>    | 11 | 42.206.000-42.477.000   | <i>vaccinia related kinase 2</i>                                                                                                            | ND                                                                                              | cattle                              | Schwerin <i>et al.</i> 2003                                                                                             |

|               |    |               |                  |               |    |                       |                                                              |                                                             |                  |                                                                |
|---------------|----|---------------|------------------|---------------|----|-----------------------|--------------------------------------------------------------|-------------------------------------------------------------|------------------|----------------------------------------------------------------|
| <i>Ptgs1</i>  | 2  | <i>PTGSI</i>  | 9 (q32-q33.3)    | <i>PTGSI</i>  | 11 | 96.337.000-96.402.000 | <i>prostaglandin-endoperoxide synthase 1</i>                 | ND                                                          | cattle           | Pfäfl <i>et al.</i> 2003                                       |
| <i>Cdk8</i>   | 5  | <i>CDK8</i>   | 13 (q12)         | <i>CDK8</i>   | 12 | 33.096.000-33.217.000 | <i>cyclin-dependent kinase 8</i>                             | ND                                                          | cattle           | Schwerin <i>et al.</i> 2003                                    |
| <i>Cebpb</i>  | 2  | <i>CEBPB</i>  | 20 (q13.1)       | <i>CEBPB</i>  | 13 | 83M                   | <i>CCAAT/enhancer binding protein (C/EBP), beta</i>          | <i>E. coli</i>                                              | mouse            | Zheng <i>et al.</i> 2006                                       |
| <i>Map3k8</i> | 18 | <i>MAP3K8</i> | 10 (p11.23)      | <i>MAP3K8</i> | 13 | 35.203.000-35.268.000 | <i>mitogen activated protein kinase kinase 8</i>             | <i>E. coli</i>                                              | mouse            | Zheng <i>et al.</i> 2006                                       |
| <i>Mmp9</i>   | 2  | <i>MMP9</i>   | 20 (q11.2-q13.1) | <i>MMP9</i>   | 13 | 75.514.200-75.532.500 | <i>matrix metalloproteinase 9</i>                            | <i>E. coli</i>                                              | cattle           | Long <i>et al.</i> 2001                                        |
| <i>Ahcy</i>   | 2  | <i>AHCY</i>   | 20 (cen-q13.1)   | <i>AHCY</i>   | 13 | 64.337.780-64.340.670 | <i>S-adenosylhomocysteine hydrolase</i>                      | ND                                                          | cattle           | Schwerin <i>et al.</i> 2003                                    |
| <i>Lbp</i>    | 2  | <i>LBP</i>    | 20 (q11.23-q12)  | <i>LBP</i>    | 13 | 67.761.000-67.869.000 | <i>lipopolysaccharide binding protein</i>                    | <i>K. pneumoniae</i><br><i>E. coli</i> and <i>S. aureus</i> | cattle<br>cattle | Bannerman <i>et al.</i> 2004a<br>Bannerman <i>et al.</i> 2004b |
| <i>Ly96</i>   | 1  | <i>LY96</i>   | 8 (q21.11)       | <i>LY96</i>   | 14 | 54 M                  | <i>lymphocyte antigen 96</i>                                 | <i>E. coli</i>                                              | mouse            | Zheng <i>et al.</i> 2006                                       |
| <i>Prkdc</i>  | 16 | <i>PRKDC</i>  | 8 (q11)          | <i>PRKDC</i>  | 14 | 18.986.000-19.305.000 | <i>protein kinase, DNA activated, catalytic polypeptide</i>  | ND                                                          | cattle           | Schwerin <i>et al.</i> 2003                                    |
| <i>Hspa8</i>  | 9  | <i>HSPA8</i>  | 11 (q24.1)       | <i>HSPA8</i>  | 15 | 32.344.800-32.355.900 | <i>heat shock protein 8</i>                                  | <i>E. coli</i>                                              | mouse            | Zheng <i>et al.</i> 2006                                       |
| <i>Casp4</i>  | 9  | <i>CASP4</i>  | 11 (q22.2-q22.3) | <i>CASP4</i>  | 15 | 2.083.000-2.131.000   | <i>caspase 4, apoptosis-related cysteine peptidase</i>       | <i>E. coli</i>                                              | mouse            | Zheng <i>et al.</i> 2006                                       |
| <i>Birc3</i>  | 9  | <i>BIRC3</i>  | 11 (q22)         | <i>BIRC3</i>  | 15 | 5.373.000-5.450.000   | <i>baculoviral IAP repeat-containing 3</i>                   | <i>E. coli</i>                                              | mouse            | Zheng <i>et al.</i> 2006                                       |
| <i>Ucp3</i>   | 7  | <i>UCP3</i>   | 11 (q13)         | <i>UCP3</i>   | 15 | 53.096.400-53.122.700 | <i>uncoupling protein 3 (mitochondrial, proton carrier)</i>  | <i>E. coli</i>                                              | mouse            | Zheng <i>et al.</i> 2006                                       |
| <i>Hnrpu</i>  | 1  | <i>HNRPU</i>  | 1 (q44)          | <i>HNRPU</i>  | 16 | 29.695.100-29.699.100 | <i>heterogeneous nuclear ribonucleoprotein U</i>             | ND                                                          | cattle           | Schwerin <i>et al.</i> 2003                                    |
| <i>Selp</i>   | 1  | <i>SELP</i>   | 1 (q22-q25)      | <i>SELP</i>   | 16 | 34.635.000-34.743.000 | <i>selectin, platelet</i>                                    | <i>E. coli</i>                                              | mouse            | Zheng <i>et al.</i> 2006                                       |
| <i>Rsc1a1</i> | NA | <i>RSC1A1</i> | 1 (p36.1)        | <i>RSC1A1</i> | 16 | 49.123.000-49.212.000 | <i>regulatory solute carrier protein, family 1, member 1</i> | ND                                                          | cattle           | Schwerin <i>et al.</i> 2003                                    |
| <i>Ptgs2</i>  | 1  | <i>PTGS2</i>  | 1 (q25.2-q25.3)  | <i>PTGS2</i>  | 16 | 65.506.300-65.525.400 | <i>prostaglandin-endoperoxide synthase 2</i>                 | ND                                                          | cattle           | Pfäfl <i>et al.</i> 2003                                       |
| <i>Tlr2</i>   | 3  | <i>TLR2</i>   | 4 (q32)          | <i>TLR2</i>   | 17 | 4.271.600-4.304.700   | <i>toll-like receptor 2</i>                                  | <i>E. coli</i><br>ND                                        | mouse.<br>cattle | Zheng <i>et al.</i> 2006<br>Goldammer <i>et al.</i> 2004       |

|               |    |               |                  |               |    |                       |                                                                                                  |                                                             |                  |                                                  |
|---------------|----|---------------|------------------|---------------|----|-----------------------|--------------------------------------------------------------------------------------------------|-------------------------------------------------------------|------------------|--------------------------------------------------|
| <i>Taok3</i>  | 5  | <i>TAOK3</i>  | 12 (q)           | <i>TAOK3</i>  | 17 | 59,650,000-60,130,000 | <i>TAO kinase 3</i>                                                                              | ND                                                          | cattle           | Schwerin et al. 2003                             |
| <i>Hp</i>     | 8  | <i>HP</i>     | 16 (q22.1)       | <i>HP</i>     | 18 | 38,128,500-38,143,900 | <i>haptoglobin</i>                                                                               | <i>E. coli</i>                                              | mouse            | Zheng et al. 2006                                |
| <i>Relb</i>   | 7  | <i>RELB</i>   | 19 (q13.32)      | <i>RELB</i>   | 18 | 52,460,000-52,527,000 | <i>avian reticuloendotheliosis viral (v-rel) oncogene related B</i>                              | <i>E. coli</i>                                              | mouse            | Zheng et al. 2006                                |
| <i>Kcnn4</i>  | 7  | <i>KCNN4</i>  | 19 (q13.2)       | <i>KCNN4</i>  | 18 | 51,693,800-51,728,000 | <i>potassium intermediate/small conductance calcium-activated channel, subfamily N, member 4</i> | <i>E. coli</i>                                              | mouse            | Zheng et al. 2006                                |
| <i>Bax</i>    | 7  | <i>BAX</i>    | 19 (q13.3-q13.4) | <i>BAX</i>    | 18 | 55,349,200-55,359,700 | <i>Bcl2-associated X protein</i>                                                                 | <i>E. coli</i>                                              | cattle           | Long et al. 2001                                 |
| <i>C5ar1</i>  | 7  | <i>C5ARI</i>  | 19 (q13.3-q13.4) | <i>C5ARI</i>  | 18 | 54,091,000-54,138,000 | <i>complement component 5a receptor 1</i>                                                        | <i>K. pneumoniae</i><br><i>E. coli</i> and <i>S. aureus</i> | cattle<br>cattle | Bannerman et al. 2004a<br>Bannerman et al. 2004b |
| <i>Ccl5</i>   | 11 | <i>CCL5</i>   | 17 (q11.2-q12)   | <i>CCL5</i>   | 19 | 13,965,800-13,982,700 | <i>chemokine (C-C motif) ligand 5</i>                                                            | <i>E. coli</i>                                              | cattle           | Pareek et al. 2005                               |
| <i>Stat3</i>  | 11 | <i>STAT3</i>  | 17 (q21.31)      | <i>STAT3</i>  | 19 | 43,730,000-43,808,000 | <i>signal transducer and activator of transcription 3</i>                                        | <i>E. coli</i>                                              | mouse            | Zheng et al. 2006                                |
| <i>Ccl2</i>   | 11 | <i>CCL2</i>   | 17 (q11.2-q12)   | <i>CCL2</i>   | 19 | 13,820,900-13,824,700 | <i>chemokine (C-C motif) ligand 2</i>                                                            | <i>E. coli</i>                                              | mouse            | Zheng et al. 2006                                |
| <i>Ccl7</i>   | 11 | <i>CCL7</i>   | 17 (q11.2-q12)   | <i>CCL7</i>   | 19 | 15,663,900-15,668,600 | <i>chemokine (C-C motif) ligand 7</i>                                                            | <i>E. coli</i>                                              | mouse            | Zheng et al. 2006                                |
| <i>Ccl3</i>   | 11 | <i>CCL3</i>   | 17 (q11-q21)     | <i>CCL3</i>   | 19 | 10 M                  | <i>chemokine (C-C motif) ligand 3</i>                                                            | <i>E. coli</i>                                              | mouse            | Zheng et al. 2006                                |
| <i>Cxcl16</i> | 11 | <i>CXCL16</i> | 17 (p13)         | <i>CXCL16</i> | 19 | 26,980,700-26,989,400 | <i>chemokine (C-X-C motif) ligand 16</i>                                                         | <i>E. coli</i>                                              | mouse            | Zheng et al. 2006                                |
| <i>Acly</i>   | 11 | <i>ACLY</i>   | 17 (q12-q21)     | <i>ACLY</i>   | 19 | 43,374,000-43,485,000 | <i>ATP citrate lyase</i>                                                                         | <i>E. coli</i>                                              | mouse            | Zheng et al. 2006                                |
| <i>Trp53</i>  | 11 | <i>TP53</i>   | 17 (p13.1)       | <i>TP53</i>   | 19 | 27,870,400-27,901,300 | <i>transformation related protein 53</i>                                                         | ND                                                          | cattle           | Schwerin et al. 2003                             |
| <i>Nr1d1</i>  | 11 | <i>NR1D1</i>  | 17 (q11.2)       | <i>NR1D1</i>  | 19 | 41,649,900-41,668,200 | <i>nuclear receptor subfamily 1, group D, member 1</i>                                           | ND                                                          | cattle           | Schwerin et al. 2003                             |
| <i>Dusp1</i>  | 17 | <i>DUSP1</i>  | 5 (q34)          | <i>DUSP1</i>  | 20 | 4,573,500-4,581,200   | <i>dual specificity phosphatase 1</i>                                                            | <i>E. coli</i>                                              | mouse            | Zheng et al. 2006                                |
| <i>Calm2</i>  | 17 | <i>CALM2</i>  | 2 (p21)          | <i>CALM2</i>  | 20 | 8,507,370-8,510,270   | <i>calmodulin 2</i>                                                                              | <i>E. coli</i>                                              | mouse            | Zheng et al. 2006                                |
| <i>Oxct1</i>  | 15 | <i>OXCT1</i>  | 5 (p13.1)        | <i>OXCT1</i>  | 20 | 34,743,000-35,044,000 | <i>3-oxoacid CoA transferase 1</i>                                                               | <i>E. coli</i>                                              | mouse            | Zheng et al. 2006                                |
| <i>Nfkbia</i> | 12 | <i>NFKBIA</i> | 14 (q13)         | <i>NFKBIA</i> | 21 | 46,437,800-           | <i>nuclear factor of kappa light</i>                                                             | <i>E. coli</i>                                              | mouse            | Zheng et al. 2006                                |

|                |    |               |             |  |  |               |    |                       |                                                           |                                                                   |        |  |  |  |  |  |  |  |                                                                        |
|----------------|----|---------------|-------------|--|--|---------------|----|-----------------------|-----------------------------------------------------------|-------------------------------------------------------------------|--------|--|--|--|--|--|--|--|------------------------------------------------------------------------|
|                |    |               |             |  |  |               |    | 46.446.300            | <i>chain gene enhancer in B-cells inhibitor, alpha</i>    |                                                                   |        |  |  |  |  |  |  |  |                                                                        |
| <i>Bcl2ala</i> | 9  | <i>BCL2A1</i> | 15 (q24.3)  |  |  | <i>BCL2A1</i> | 21 | 25.747.600-25.772.000 | <i>B-cell leukemia/lymphoma 2 related protein A1a</i>     | <i>E. coli</i>                                                    | mouse  |  |  |  |  |  |  |  | Zheng et al. 2006                                                      |
| <i>Fezf2</i>   | 14 | <i>FEZF2</i>  | 3 (p14.2)   |  |  | <i>FEZF2</i>  | 22 | 39.843.600-39.855.300 | <i>Fez family zinc finger 2</i>                           | <i>E. coli</i>                                                    | cattle |  |  |  |  |  |  |  | Sugimoto et al. 2006                                                   |
| <i>Ltf</i>     | 9  | <i>LTF</i>    | 3 (q21-q23) |  |  | <i>LTF</i>    | 22 | 54.289.000-54.372.000 | <i>lactoferrin</i>                                        | ND                                                                | cattle |  |  |  |  |  |  |  | Pfaffl et al. 2003                                                     |
| <i>Dcdc2a</i>  | 13 | <i>DCDC2</i>  | 6 (p22.1)   |  |  | <i>DCDC2</i>  | 23 | 34 M                  | <i>doublecortin domain containing 2</i>                   | <i>E. coli</i>                                                    | cattle |  |  |  |  |  |  |  | Pareek et al. 2005                                                     |
| <i>Cfb</i>     | 17 | <i>CFB</i>    | 6 (p21.3)   |  |  | <i>CFB</i>    | 23 | 27.202.700-27.217.800 | <i>complement factor B</i>                                | <i>E. coli</i>                                                    | mouse  |  |  |  |  |  |  |  | Zheng et al. 2006                                                      |
| <i>Kenk5</i>   | 14 | <i>KCNK5</i>  | 6 (p21)     |  |  | <i>KCNK5</i>  | 23 | 13.528.000-13.625.000 | <i>potassium channel, subfamily K, member 5</i>           | <i>E. coli</i>                                                    | mouse  |  |  |  |  |  |  |  | Zheng et al. 2006                                                      |
| <i>Ssr1</i>    | 13 | <i>SSRI</i>   | 6 (p24.3)   |  |  | <i>SSRI</i>   | 23 | 48.904.000-48.950.000 | <i>signal sequence receptor, alpha</i>                    | <i>S. agalactiae</i>                                              | cattle |  |  |  |  |  |  |  | Schwerin et al. 2003                                                   |
| <i>Tnf</i>     | 17 | <i>TNF</i>    | 6 (p21.3)   |  |  | <i>TNF</i>    | 23 | 27.529.200-27.536.100 | <i>tumor necrosis factor</i>                              | <i>E. coli</i> and <i>S. aureus</i>                               | cattle |  |  |  |  |  |  |  | Lee et al. 2006                                                        |
| <i>Lyn</i>     | 4  | <i>LYN</i>    | 8 (q13)     |  |  | <i>YES1</i>   | 24 | 36.749.000-36.911.000 | <i>Yamaguchi sarcoma viral (γ-yes-1) oncogene homolog</i> | <i>K. pneumoniae</i><br><i>E. coli</i> and <i>S. aureus</i><br>ND | cattle |  |  |  |  |  |  |  | Bannerman et al. 2004a<br>Bannerman et al. 2004b<br>Pfaffl et al. 2003 |
| <i>Bcl2</i>    | 1  | <i>BCL2</i>   | 18 (q21.3)  |  |  | <i>BCL2</i>   | 24 | 63.860.000-64.370.000 | <i>B-cell leukemia/lymphoma 2</i>                         | <i>E. coli</i>                                                    | cattle |  |  |  |  |  |  |  | Long et al. 2001                                                       |
| <i>Actb</i>    | 5  | <i>ACTB</i>   | 7 (p15-p12) |  |  | <i>ACTB</i>   | 25 | 40.632.600-40.641.100 | <i>actin, beta, cytoplasmic</i>                           | <i>E. coli</i> and <i>S. aureus</i>                               | cattle |  |  |  |  |  |  |  | Lee et al. 2006                                                        |
| <i>Plce1</i>   | 19 | <i>PLCE1</i>  | 10 (q23)    |  |  | <i>PLCE1</i>  | 26 | 15.580.000-16.500.000 | <i>phospholipase C, epsilon 1</i>                         | <i>S. agalactiae</i>                                              | cattle |  |  |  |  |  |  |  | Schwerin et al. 2003                                                   |
| NA             | NA | NA            | NA          |  |  | <i>LAP</i>    | 27 | 7.407.100-7.411.600   | <i>lingual antimicrobial peptide</i>                      | <i>S. uberis, S. aureus, Corynebacterium spp.</i>                 | cattle |  |  |  |  |  |  |  | Swanson et al. 2004                                                    |
| <i>Plat</i>    | 8  | <i>PLAT</i>   | 8 (p12)     |  |  | <i>PLAT</i>   | 27 | 39.451.000-39.511.000 | <i>plasminogen activator, tissue</i>                      | <i>E. coli</i>                                                    | cattle |  |  |  |  |  |  |  | Pareek et al. 2005                                                     |
| <i>Acs1l</i>   | 8  | <i>ACSL1</i>  | 4 (q34-q35) |  |  | <i>ACSL1</i>  | 27 | 16.445.000-16.607.000 | <i>acyl-CoA synthetase long-chain family member 1</i>     | <i>E. coli</i>                                                    | mouse  |  |  |  |  |  |  |  | Zheng et al. 2006                                                      |
| <i>Kenk1</i>   | 8  | <i>KCNK1</i>  | 1 (q42-q43) |  |  | <i>KCNK1</i>  | 28 | 4.743.000-4.911.000   | <i>potassium channel, subfamily K, member 1</i>           | <i>E. coli</i>                                                    | mouse  |  |  |  |  |  |  |  | Zheng et al. 2006                                                      |

|              |    |              |                |              |    |                       |                                                                            |                      |                 |                                                         |
|--------------|----|--------------|----------------|--------------|----|-----------------------|----------------------------------------------------------------------------|----------------------|-----------------|---------------------------------------------------------|
| <i>Alox5</i> | 6  | <i>ALOX5</i> | 10 (q11.2)     | <i>ALOX5</i> | 28 | 44.440.000-44.556.000 | <i>arachidonate 5-lipoxygenase</i>                                         | ND                   | cattle          | Pfäfl <i>et al.</i> 2003                                |
| <i>Rela</i>  | 19 | <i>RELA</i>  | 11 (q13)       | <i>RELA</i>  | 29 | 45.686.400-45.708.100 | <i>v-rel reticuloendotheliosis viral oncogene homolog A (avian)</i>        | <i>E. coli</i>       | mouse           | Zheng <i>et al.</i> 2006                                |
| <i>Saa2</i>  | 7  | <i>SAA2</i>  | 11 (p15.1-p14) | <i>SAA2</i>  | 29 | 22 M                  | <i>serum amyloid A 2</i>                                                   | <i>E. coli</i>       | mouse           | Zheng <i>et al.</i> 2006                                |
| <i>Saa1</i>  | 7  | <i>SAA1</i>  | 11 (p15.1)     | <i>SAA1</i>  | 29 | 22 M                  | <i>serum amyloid A 1</i>                                                   | <i>E. coli</i>       | mouse           | Zheng <i>et al.</i> 2006                                |
| <i>Saa3</i>  | 7  | <i>SAA3</i>  | 11 (p15.1)     | <i>SAA3</i>  | 29 | 27.681.500-27.690.900 | <i>serum amyloid A 3</i>                                                   | <i>E. coli</i><br>ND | mouse<br>cattle | Zheng <i>et al.</i> 2006<br>Schwerin <i>et al.</i> 2003 |
| <i>Tirap</i> | 9  | <i>TIRAP</i> | 11 (q24.2)     | <i>TIRAP</i> | 29 | 31.225.600-31.237.700 | <i>toll-interleukin 1 receptor (TIR) domain-containing adaptor protein</i> | <i>E. coli</i>       | mouse           | Zheng <i>et al.</i> 2006                                |
| <i>Ahnak</i> | 19 | <i>AHNAK</i> | 11 (q12.2)     | <i>AHNAK</i> | 29 | 42.566.300-42.578.700 | <i>AHNAK nucleoprotein (desmoyokin)</i>                                    | <i>S. agalactiae</i> | cattle          | Schwerin <i>et al.</i> 2003                             |
| <i>Cdkl5</i> | X  | <i>CDKL5</i> | X (p22)        | <i>CDKL5</i> | X  | 15 M                  | <i>serine/threonine kinase 9 (cyclin-dependent kinase-like 5)</i>          | <i>S. agalactiae</i> | cattle          | Schwerin <i>et al.</i> 2003                             |
| <i>Enox2</i> | X  | <i>ENOX2</i> | X (q25-q26.2)  | <i>ENOX2</i> | X  | 80 M                  | <i>ecto-NOX disulfide-thiol exchanger 2</i>                                | ND                   | cattle          | Schwerin <i>et al.</i> 2003                             |
| <i>Defb5</i> | 8  | NA           | NA             | <i>BNBD5</i> | NA | UN                    | <i>defensin beta 5</i>                                                     | ND                   | cattle          | Goldammer <i>et al.</i> 2004                            |

NA, not available; ND, not defined; M, location in mega base-pairs identified using bovine-human synteny map.
