# Supplementary material for: Database of cattle candidate genes and genetic markers for milk production and mastitis
Source: PubMed Central journal article supplement (PMC2779988; doi:10.1111/j.1365-2052.2009.01921.x), 2009-12
Supplement: age0040-0832-SD4.pdf [file age0040-0832-SD4.pdf]

**Table S4.** Milk protein genes and their variants (adapted from Farrell *et al.* 2004 and Buchberger & Dovc 2000).

| Gene          | Chr.        | Location                | Gene description                             | Milk protein            | Number of variants | Protein variants                                                                                                                                                                                         |
|---------------|-------------|-------------------------|----------------------------------------------|-------------------------|--------------------|----------------------------------------------------------------------------------------------------------------------------------------------------------------------------------------------------------|
| <i>LALBA</i>  | 5 (q21)     | 34.385.300-34.390.400   | <i>lactalbumin, alpha</i>                    | $\alpha$ - lactalbumin  | 3                  | A, B*, C                                                                                                                                                                                                 |
| <i>CSN1S1</i> | 6 (q26-q33) | 88.294.650-88.295.570   | <i>casein alpha s1</i>                       | $\alpha_{S1}$ - casein  | 11                 | A, B*, C*, D, E, F, G,H, X, X', Y                                                                                                                                                                        |
| <i>CSN1S2</i> | 6 (q31)     | 88.395.000-88.441.000   | <i>casein alpha s2</i>                       | $\alpha_{S2}$ - casein  | 4                  | A*, B, C, D                                                                                                                                                                                              |
| <i>CSN2</i>   | 6 (q31)     | 88.322.000-88.345.400   | <i>casein beta</i>                           | $\beta$ - casein        | 17                 | A <sup>1*</sup> , A <sup>2*</sup> , A <sup>3</sup> , A <sup>3</sup> Mongolie, A <sup>4</sup> , A <sup>5</sup> , B*, B <sub>2</sub> , B <sub>2</sub> , C, D, E, F, G, H <sup>1</sup> , H <sup>2</sup> , I |
| <i>CSN3</i>   | 6 (q31)     | 88.511.600-88.544.300   | <i>casein kappa</i>                          | $\kappa$ - casein       | 16                 | A*, A <sup>1</sup> , A <sub>1SS</sub> , B*, B <sup>2</sup> , C, E, F <sup>1</sup> , F <sup>2</sup> , G <sup>1</sup> , G <sup>2</sup> , H, I, J, X, Y                                                     |
| <i>LGB</i>    | 11 (q28)    | 107.163.200-107.175.000 | <i>lactoglobulin, beta</i>                   | $\beta$ - lactoglobulin | 16                 | A*, B*, C, D, Dr, D <sub>Yak</sub> , E, F, G, H, I, J, W, X, Y, Z                                                                                                                                        |
| <i>IGHG1</i>  | 21 (q24)    | 60 M                    | <i>immunoglobulin heavy constant gamma 1</i> | immunoglobulin G1       | 2                  | IgG1 <sup>a</sup> , IgG1 <sup>b</sup>                                                                                                                                                                    |
| <i>IGHG2</i>  | 21(q23-q24) | 60 M                    | <i>immunoglobulin heavy constant gamma 2</i> | immunoglobulin G2       | 2                  | IgG2 <sup>a</sup> , IgG2 <sup>b</sup>                                                                                                                                                                    |
| <i>IGHG3</i>  | 21 (q24)    | 60 M                    | <i>immunoglobulin heavy constant gamma 3</i> | immunoglobulin G3       | 2                  | IgG3 <sup>a</sup> , IgG3 <sup>b</sup>                                                                                                                                                                    |

\*, common variants; M, location in mega base-pairs identified using bovine-human synteny map.
