# Supplementary material for: Database of cattle candidate genes and genetic markers for milk production and mastitis
Source: PubMed Central journal article supplement (PMC2779988; doi:10.1111/j.1365-2052.2009.01921.x), 2009-12
Supplement: age0040-0832-SD5.pdf [file age0040-0832-SD5.pdf]

**Table S5** miRNAs expressed in mammary gland (adapted from Gu *et al.* 2007).

| miRNA               | Chr. | Location (bp)           | Sequence                  | Overlapping QTL | Putative miRNA target sites in candidate genes                                                                                                              |
|---------------------|------|-------------------------|---------------------------|-----------------|-------------------------------------------------------------------------------------------------------------------------------------------------------------|
| <i>bta-miR-15b</i>  | 1    | 108.876.544-108.876.641 | UAGCAGCACAUCAUGGUUUACA    | PY, MY          | <i>LALBA, CHEKI, TNFAIP3, CSNIS2, PIN1, PTHLH, MIA, SLC39A8, BTN1A1, SSR2, APOD</i>                                                                         |
| <i>bta-mir-16</i>   | 1    | 108.876.401-108.876.493 | UAGCAGCACGUA AAU AUUGGC   | PY, MY          | <i>LALBA, CHEKI, UCP3, BIN1, ELF2, CXCL2, ETS2, PTHLH, NBRI, ADFP, EGF, BTN1A1, KRICAP2, APOD</i>                                                           |
| <i>bta-mir-29a</i>  | 4    | 97.826.811-97.826.874   | CUAGCACCAUCUGAAAUCGGUUA   |                 | <i>XDH, OXTR, MEOX2, FOS, B2M, SLC1A4, IGFALS, MYL6, GPSI, FABP3, EGF, SLC39A8</i>                                                                          |
| <i>bta-mir-148b</i> | 5    | 28.577.700-28.577.789   | UCAGUGCAUCACAGA CUUUGU    | MY, PC          | <i>STAT5A, NCOA1, VGF, BCL2A1, CCL3, CBL, OSTF1, GUSB, RINT1, HOXC6, NITI, CSF1, RAB20, ACTA2, DVL2, DPEP3, DHRS1, PFKL</i>                                 |
| <i>bta-mir-26a</i>  | 5    | 60.085.852-60.085.935   | UUCAAAGUAAUCCAGGAUAGGCU   | FY, PY          | <i>CSN3, KCNK1, CDK8, IFNG, HOXC6, UCP3, HSPA8, HGF, CFB, GADD45B</i>                                                                                       |
| <i>bta-mir-145</i>  | 7    | 60.270.231-60.270.318   | GUCCAGUUUCCCAGGAUCCCU     | SCS, MY, PY, FP | <i>YES1, TIRAP, LBP, C5ARI, RINT1</i>                                                                                                                       |
| <i>bta-mir-23a</i>  | 7    | 10.102.128-10.102.200   | AUCACAUUGCCAGGGAUUUCC     | FY, PY          | <i>PTGSI, CSN2, YES1, LATSI, STAT5B, VRK2, IL6, AEBP1, NEO1, KCNK5, TNF</i>                                                                                 |
| <i>bta-mir-101</i>  | 8    | 41.898.819-41.898.897   | UACAGUACUGUAU AACUGAA     | MSPD            | <i>CHEKI, GJAI, CDK8, BCL2A1, LBP, PROKR2, HSP48, CBL, PGR, JAK2, JUNB, FOS, GLI3, HOXC6, CXCLI, OXTR, CDH3, DUSP1, TNFSF11, MYL6, RAB3IP, CSRP2, STMN1</i> |
| <i>bta-mir-23b</i>  | 8    | 85.962.044-85.962.103   | AUCACAUUGCCAGGGAU AACCCAC | PP              | <i>PTGSI, YES1, LATSI, STS5B, VRK2, KCNK5, AEBP1, IL6, CXCL5, VRK2, LEP, CTSC, GK, DVL2, HSPD1</i>                                                          |
| <i>bta-let-7a</i>   | 8    | 89.743.299-89.743.378   | UGAGGUAGUAGGUUUAUAGUU     |                 | <i>LALBA, TP53, CDK8, MFGE8, MKLI, HOXC6, RSC1A1, PROKR2, NTNI, CD14, CFB, IL6, CSN3, ELF2, SRPR, OSOX1, LGL2, SLC35B1, CAPN6, NUCB2, TAGLN, NANS</i>       |

|                     |    |                         |                           |                |                                                                                                                             |
|---------------------|----|-------------------------|---------------------------|----------------|-----------------------------------------------------------------------------------------------------------------------------|
| <i>bta-let-7f</i>   | 8  | 89.743.299-89.743.378   | UGAGGUAGUAGAUUGUAUAGUU    |                | LALBA, TP53, CDK8, MKL1, HOXC6, RSC1A1, NTN1, ELF2, CFB, IL6, CSN3, SRPR, QSOX1, LLGL2, SLC35B1, CAPN6, NUCB2, DHRS1, CD320 |
| <i>bta-mir-126</i>  | 11 | 108.009.392-108.009.464 | CGUACCGUGAGUAUAUAGCG      |                | TTRAP, SELP, CXCL16, MNT, ELF2, ACTA2, NUCB2                                                                                |
| <i>bta-mir-199b</i> | 11 | 102419001-102419100     | CCCAGUGUUAGACUAUCUGUUC    |                | CSN3, PTGS1, MRG3, NTN1, CXCL16, STA1I, DUSP1, GUSB, NEOL, DDRI, JUNB, CSF2, MAP3K11, CSRP2, PIGR, CYB561, ENO3             |
| <i>bta-mir-15a</i>  | 12 | 18.887.743-18.887.825   | UAGCAGCACAUAAUGGUUUUGU    | MY, PY, PP, FY | LALBA, CHEK1, HR, DDRI, CSNIS2, KCNN4, PTHLH, NBR1                                                                          |
| <i>bta-mir-30b</i>  | 14 | 6.477.866-6.477.953     | UGUAAACAUCUACACUCAGCU     | MY, PP, FY, FP | SIRT1, AHNAK, NME1, CCL3, UCP3, MSX2, IL6ST, HOXC6, RAB20, CMA1, RAB3IP, ACTA2, CYB561, NME1, GLDC, FOXH1                   |
| <i>bta-mir-125b</i> | 15 | 31.406.340-31.406.427   | UCCCUGAGACCCUAAUCUUGUGA   | SCS            | TNF, KCNK5, B2M, BAX, OXCT1, VGF, TNFAIP3, NFKB14, ERBB3, IFNG, MAP3K11, TNXB, IRF4, GNAI5, ELOVL1, PFKL                    |
| <i>bta-mir-199a</i> | 16 | 36.247.788-36.247.891   | ACAGUAGUCUGACAUCUUGUUA    |                | PLG, MAP3K11, CSRP2, LLGL2                                                                                                  |
| <i>bta-mir-205</i>  | 16 | 72.083.257-72.083.325   | UCCUUCAUUCCACCGGAGUCUG    |                | CSF1R, INHBB, SLC643, KCNN4, ROGDI                                                                                          |
| <i>bta-mir-214</i>  | 16 | 36.241.995-36.242.104   | GUACAGCAGGCACACAGCAGGCAGU |                | LALBA, MFG8, HOXC6, SELP, CFB, APM1, LTF, MAP3K11, COX8, FAMI104, NBRI, LCN2, TCN2, LAMB3, EGF, BTN1A1, CTSS, APOD, ST6GALI |
| <i>bta-mir-29c</i>  | 16 | 73.887.217-73.887.304   | UAGCACCAUUUGAAAUCGGUUA    |                | ID2, BRCA2, OXCT1, FOS, NIT1, EHHADH, RBM9, MYL6, TFAP2C, CA2, ITGAV                                                        |
| <i>bta-mir-195</i>  | 19 | 27.179.312-27.179.398   | UAGCAGCACAGAAAUAUUGGCA    | SCS, FY        | LALBA, CHEK1, IL6ST, ELF2, NFKB1, DDRI, SSR1, PTHLH, NBRI, EGF, BTN1A1, KRTCAP2                                             |
| <i>bta-mir-142</i>  | 19 | 8.516.953-8.517.039     | CCCAUAAAAGUAGAAAAGCACUA   |                | CSN2, LBP, CDKL5, C5ARI, PPARG, NEOL, RORA, B2M, CD9, ITGAV                                                                 |
| <i>bta-mir-142b</i> | 19 | 1.061.191-1.061.105     | CAUAAAAGUAGAAAAGCACUACUA  |                | CSN2, LBP, CDKL5, C5ARI, PPARG1, NEOL, RORA, B2M, CD9, ITGAV, TMEMI65                                                       |
| <i>bta-mir-21</i>   | 19 | 10.049.133-10.049.204   | UAGCUUAUCAGACUGAUGUUGACU  |                | PPYRI, GLI2, C5ARI, B2M, DCDC2, NR3C1, CSRP2, MKI67                                                                         |

| miRNA              | Accession | Position | Coordinates           | Sequence                   | Annotations                                                                   |
|--------------------|-----------|----------|-----------------------|----------------------------|-------------------------------------------------------------------------------|
| <i>bta-mir-497</i> |           | 19       | 27.179.621-27.179.732 | CAGCAGCACACUGGGUUUGUA      | <i>LALBA, CHEK1, TNFAIP3, ACSL1, KCNN4, RINT1, PTHLH,</i>                     |
| <i>bta-mir-103</i> |           | 20       | 2.864.127-2.864.198   | AGCAGCAUUGUACAGGGCUAUGA    | <i>CHEK1, PLG, TIMP3, ACLY, CCL3, HOXD9, VPK2, SEPX1, PEX14</i>               |
| <i>bta-mir-342</i> |           | 21       | 65.160.823-65.160.916 | UCUCACACAGAAAUCGCACCCCAUCU | <i>CDKL5, PTCHI, MYBL1, DUSP1, SLC6A3, CDH3, KCNK5, GADD45B, CTBP2, QSOX1</i> |
| <i>bta-mir-191</i> |           | 22       | 51.902.736-51.902.826 | CAACGGAAUCCCCAAAAGCAGCUG   | <i>LALBA, XDH, HOXD9, TP73L, CD9, MGP, FOLR1, FABP3, IRX3, GNAI5</i>          |
| <i>bta-mir-374</i> | X         |          | 46.871.549-46.871.620 | UUUAUAUACAACCUGAUAAAGUG    | <i>BIRC2, LATS1, PTGS2, HSPA8, ZFPM2, RBMS1, MSX1, HOXC6, NR3C1, PYCR2</i>    |
| <i>bta-mir-210</i> | NA        | NA       | NA                    | ACUGUGCGUGUGACAGCGGCUGA    | <i>NCOA1, YES1, HOXC6, PROKR2, FASN, TBX2, GUSB, NME1, AEBP1, ROGDI</i>       |
| <i>bta-mir-143</i> | NA        | NA       | NA                    | UGAGAUGAAGCACUGUAGCUC      | NA                                                                            |
| <i>bta-mir-339</i> | NA        | NA       | NA                    | UACCUGUCCUCCAGGAGCUCA      | NA                                                                            |

NA, not available; FY, fat yield; MY, milk yield; CM, clinical mastitis; SCS, somatic cell score; PY, protein yield; FP, fat percentage; PP, protein percentage; EY, energy yield.
